# 1 **Vimentin filaments interact with the mitotic cortex allowing**

## 2 **normal cell division**

3 Sofia Duarte<sup>1</sup>, Álvaro Viedma-Poyatos<sup>1</sup>, Elena Navarro-Carrasco<sup>1</sup>, Alma E. Martínez<sup>1,a</sup>,  
4 María A. Pajares<sup>1,2</sup>, Dolores Pérez-Sala<sup>1\*</sup>

5 <sup>1</sup>Department of Structural and Chemical Biology, Centro de Investigaciones Biológicas (CSIC),  
6 Ramiro de Maeztu 9, 28029 Madrid, Spain.

7 <sup>2</sup>Molecular Hepatology Group, Instituto de Investigación Sanitaria La Paz (IdiPAZ), Paseo de la  
8 Castellana 261, 28046 Madrid, Spain.

9 Running Title: Novel vimentin-actin interplay in mitosis

10 Keywords: Vimentin, actin, mitosis, intermediate filaments, intermediate filament-actin  
11 interplay, HIV, lipoxidation

12

13 \*To whom correspondence should be addressed at:  
14 Department of Structural and Chemical Biology  
15 Centro de Investigaciones Biológicas  
16 Consejo Superior de Investigaciones Científicas (C.S.I.C.)  
17 Ramiro de Maeztu, 9  
18 28040 Madrid, Spain  
19 Email: [dperezsala@cib.csic.es](mailto:dperezsala@cib.csic.es)  
20 FAX: 34915360432  
21 Phone: 34918373112

22

23

24 <sup>a</sup>Present address: Centro Cardiologico Monzino, Via Carlo Parea, 4, 20138 Milano MI, Italia

25 The vimentin network displays remarkable plasticity to support basic cellular functions. Here,  
26 we show that in several cell types vimentin filaments redistribute to the cell periphery during  
27 mitosis, forming a robust scaffold interwoven with cortical actin and affecting the mitotic  
28 cortex properties. Importantly, the intrinsically disordered tail domain of vimentin is essential  
29 for this redistribution, which allows normal mitotic progression. A tailless vimentin mutant  
30 forms curly bundles, which remain entangled with dividing chromosomes leading to mitotic  
31 catastrophes or asymmetric partitions. Serial deletions of the tail domain induce increasing  
32 impairments of cortical association and mitosis progression. Disruption of actin, but not of  
33 microtubules, mimics the impact of tail deletion. Pathophysiological stimuli, including HIV-  
34 protease and lipoxidation, induce similar alterations. Interestingly, filament integrity is  
35 dispensable for cortical association, which also occurs in vimentin particles. These results  
36 unveil novel implications of vimentin dynamics in cell division by means of its interplay with  
37 the mitotic cortex.

38

## 39 Introduction

40 The vimentin filament network provides architectural support for cells and contributes to the  
41 positioning and function of cellular organelles<sup>1-3</sup>. Vimentin plays multiple roles in cell  
42 regulation by interacting with signaling proteins, adhesion molecules<sup>4,5</sup>, chaperones<sup>6,7</sup> and  
43 other cytoskeletal elements<sup>8,9</sup>. The vimentin monomer consists of 466 residues organized in a  
44 central rod of predominantly  $\alpha$ -helical structure flanked by intrinsically disordered N- and C-  
45 terminal domains (Fig. 1A). Vimentin polymerization is believed to progress from parallel  
46 dimers to antiparallel tetramers, eight of which associate laterally in “unit length filaments”  
47 that engage head to tail to form filaments. The vimentin network is highly dynamic and rapidly  
48 responds to heat-shock, oxidative and electrophilic stresses, ATP and divalent cation  
49 availability<sup>10-12</sup>, playing a key role in cell adaptation.

50 Posttranslational modifications are critical for fast and versatile network remodeling<sup>13</sup>.  
51 Phosphorylation of specific residues regulates vimentin assembly and involvement in migration  
52 and invasion<sup>14,15</sup>. In mitosis, vimentin phosphorylation is regulated in a spatio-temporal  
53 manner, leading to filament disassembly in certain cell types<sup>16,17</sup>. Besides, oxidative and  
54 electrophilic modifications of vimentin’s single cysteine drastically alter network organization,  
55 highlighting its crucial role for filament architecture<sup>12,18</sup>.

56 Vimentin is also the substrate for several proteases, the resulting fragments performing  
57 additional cellular roles. Calpains cleave vimentin N-terminus impairing polymerization<sup>19</sup>, and  
58 calpain-truncated soluble vimentin associates with phosphorylated-ERK playing a role in axonal  
59 regeneration<sup>20</sup>. Conversely, caspase-generated amino-terminal fragments exert pro-apoptotic  
60 effects<sup>21</sup>. Vimentin C-terminus also contains sites for viral protease cleavage. Moloney mouse  
61 sarcoma virus infection produces fragments lacking all or part of the C-terminal tail<sup>22</sup>, whereas  
62 the HIV-type 1 protease reportedly cleaves vimentin after L423<sup>23</sup>. Curiously, chemicals like

63 gambogic acid promote vimentin cleavage in cells by yet unidentified proteases, rendering  
64 products missing sequences before S51 and/or after R424 <sup>24</sup>.

65 The role of the tail domain in vimentin organization is still incompletely understood. Purified  
66 tailless vimentin (vimentin(1-411)) polymerizes in vitro into normal filaments <sup>25-27</sup>, presenting  
67 oligomerization and sedimentation behaviors highly similar to those of full-length vimentin <sup>28</sup>,  
68 although higher heterogeneity and wider average diameter <sup>29</sup> have also been noted. In turn,  
69 the vimentin tail has been suggested to undergo conformational changes during filament  
70 elongation and assembly in vitro <sup>30</sup>, and to modulate interactions with divalent cations <sup>25,31</sup>.

71 In cells, vimentin(1-411) mutants form either normal extended arrays or filaments with a  
72 tendency to collapse, depending on the experimental system <sup>26,27</sup>. Additionally, the tail domain  
73 has been proposed to act as a cytoplasmic retention signal <sup>32</sup> and contribute to filament  
74 stability <sup>26</sup>. However, the mechanism(s) by which C-terminally truncated vimentin forms induce  
75 cellular perturbations has not been fully elucidated.

76 Vimentin is an exquisite sensor for oxidative and electrophilic stresses <sup>12</sup>, and presents sites for  
77 modification by electrophilic lipids (lipoxidation) across the whole monomer <sup>33</sup>. While exploring  
78 these modifications, we have observed that C-terminal truncated mutants, particularly  
79 vimentin(1-411) and the reported product of HIV-protease cleavage <sup>23</sup>, vimentin(1-423), exert  
80 deleterious cellular effects, with formation of juxtannuclear bundles and aberrant mitosis. A  
81 deeper analysis showed that, if not disassembled, full-length vimentin redistributed to the cell  
82 periphery in mitosis, in close interplay with the mitotic cortex, leaving ample space for dividing  
83 chromosomes. Strikingly, vimentin(1-411) did not reach the cell periphery and snared the  
84 mitotic apparatus. These observations identify vimentin as a novel element of the mitotic  
85 cortex in a tail domain-dependent manner.

86

## 87 **Results**

### 88 **1. Vimentin tail is necessary for appropriate network distribution in resting and mitotic cells.**

89 To elucidate the roles of the vimentin tail domain in filament assembly and stress responses,  
90 we employed several strategies to express wild type (wt) or vimentin(1-411) in vimentin-  
91 positive or -deficient cells (Fig. 1B). Vimentin-deficient adrenocarcinoma SW13/cl.2 or breast  
92 carcinoma MCF7 cells were co-transfected with RFP//vimentin bicistronic plasmids plus GFP-  
93 vimentin vectors for network visualization in live cells. Whereas vimentin wt formed an  
94 extended network, the organization of vimentin(1-411) was drastically altered, forming curly  
95 juxtannuclear filament bundles (Fig. 1C). Importantly, transfecting vimentin(1-411) in excess  
96 over wt, impaired network extension and induced its condensation in coiled bundles (Fig. 1D).  
97 Moreover, in cells expressing endogenous vimentin, overexpression of vimentin(1-411) but not  
98 vimentin wt, markedly disrupted network distribution, causing filament retraction from the  
99 cell periphery and perinuclear condensation (quantitated in Fig. 1E). Therefore, although  
100 vimentin(1-411) polymerization is not impeded, its cellular organization is severely altered.  
101 Moreover, vimentin(1-411) exerts deleterious effects on the organization of full-length  
102 vimentin, which depend on the proportion of both forms.

103 Detailed observation of nuclear structures showed that while vimentin wt filaments extended  
104 outwards from the nuclear periphery, vimentin(1-411) thick bundles displayed extensions into  
105 the area covered by DAPI staining (Fig. 1F), appearing in deep invaginations of the nuclear  
106 envelope or distributing between nuclear lobules (Fig. 1G and Supplementary Fig. 1). This  
107 drove us to assess vimentin(1-411) behavior in mitotic cells. In SW13/cl.2 cells vimentin wt did  
108 not disassemble in mitosis but remained as robust filaments with a marked peripheral  
109 distribution (Fig. 1H). In sharp contrast, vimentin(1-411) remained tightly packed in coiled  
110 bundles, frequently in close proximity of condensed chromosomes or forming loops encircling  
111 them (Fig. 1H and Supplementary Fig. 1).

## 112 **2. Expression of tailless vimentin leads to aberrant mitosis**

113 The striking pattern of vimentin(1-411) prompted us to monitor mitotic progression. Time-  
114 lapse experiments showed that cells expressing vimentin wt divided regularly, with an interval  
115 between cell rounding and daughter cell separation of 1-2 h (Fig. 2A and Supplementary videos  
116 1 and 2), generally yielding homogeneous vimentin distribution. Conversely, cells harboring  
117 vimentin(1-411) bundles suffered diverse perturbations. Some cells attempted to divide for  
118 several hours and died during or shortly after mitosis, undergoing extensive membrane  
119 blebbing, typical of mitotic catastrophe (Fig. 2A, middle panels, and Supplementary video 3).  
120 Alternatively, some cells successfully completed division through the asymmetric partitioning  
121 of vimentin, implying retention of vimentin(1-411) in one daughter cell and “rejuvenation” of  
122 the other by initial elimination of vimentin coils (Fig. 2A, lower panels, and Supplementary  
123 video 4). Thus, the tail domain is necessary for normal vimentin dynamics during mitosis  
124 (schematized in Fig. 2B).

## 125 **3. Full-length vimentin but not vimentin(1-411) localizes to the mitotic cortex in an actin-** 126 **dependent manner.**

127 Vimentin filaments maintain a close crosstalk with microtubules and microfilaments, which  
128 influence vimentin distribution. The interplay of vimentin wt or (1-411) with tubulin and actin  
129 was analyzed by disruption of these structures with various agents (Fig. 3A). Vimentin wt  
130 partially co-localized with tubulin in interphase, whereas in mitosis, vimentin underwent  
131 peripheral redistribution and tubulin concentrated at the mitotic spindle (Fig. 3B). Vimentin(1-  
132 411) bundles were largely unconnected to microtubules in resting cells, but remained adjacent  
133 to the mitotic spindle during cell division, frequently interfering with the position of  
134 chromosomes or microtubules (Fig. 3B). Acute microtubule disruption with nocodazole  
135 completely blocked the formation of the mitotic spindle and caused misorientation of

136 chromosomes, without altering the peripheral distribution of vimentin wt in mitosis or the  
137 presence of vimentin(1-411) bundles (Fig. 3B).

138 Vimentin wt shows little coincidence with filamentous actin (f-actin) in interphase (Fig. 3C). In  
139 mitosis, f-actin accumulates at the cell periphery forming the actomyosin cortex, a stiff  
140 structure that allows spindle formation and orientation and maintains the cells spherical shape  
141 <sup>34,35</sup>. Interestingly, peripherally distributed vimentin appeared to line the internal surface of the  
142 actomyosin cortex, partially overlapping with actin (Fig. 3C, fluorescence intensity profiles).  
143 Conversely, vimentin(1-411) did not follow the actin pattern under any condition (Fig. 3C).  
144 Importantly, vimentin cortical association was not a mere consequence of cell rounding, since  
145 newly-plated round cells showed vimentin perinuclear distribution, clearly unrelated to actin  
146 (Supplementary Fig. 2).

147 Although vimentin and actin show a reciprocal regulation at several cellular structures in  
148 resting cells <sup>36,37</sup>, their interplay in mitosis has not been explored. Disruption of actin  
149 polymerization with cytochalasin B (Fig. 3C) B elicited a patchy f-actin distribution without  
150 severely affecting vimentin wt in resting cells. In mitotic cells, vimentin appeared in bundles  
151 entangled with dividing chromosomes, resembling vimentin(1-411), which was not further  
152 altered by cytochalasin B. Latrunculin A markedly decreased f-actin, leading to scattered  
153 aggregates (Fig. 3E). Loss of f-actin in mitosis correlated with vimentin bundling and  
154 intertwining with chromosomes. Interestingly, treatment with C3 toxin to inhibit Rho proteins,  
155 which are important for actomyosin cortex assembly<sup>38,39</sup>, resulted in a less homogeneous  
156 mitotic cortex and compromised vimentin peripheral distribution. Lastly, jaspalkinolide <sup>40</sup>  
157 elicited actin aggregates co-localizing with vimentin filaments in resting cells, and partially  
158 disrupted cortical association of vimentin in mitosis (Fig. 3E). In non-dividing cells, the myosin II  
159 ATPase inhibitor blebbistatin <sup>41,42</sup> induced a spikier actin pattern and intense shrinking of cell  
160 margins, where vimentin was condensed. In mitotic cells, the actin cortex was more irregular

161 and vimentin was partially dislodged from the cell periphery (Fig. 3E). These results support an  
162 important role of f-actin and mitotic cortex integrity in the tail-dependent mitotic  
163 redistribution of vimentin.

#### 164 **4. Cortical localization of vimentin occurs in several cell types and is altered under** 165 **pathophysiological conditions**

166 Next, we explored the association of vimentin with the mitotic cortex in several cell types. In  
167 MCF7 cells, transfected vimentin showed signs of disassembly in mitosis and limited cortical  
168 association (Fig. 4A). In contrast, in astrocytoma and primary endothelial cells filamentous  
169 structures of endogenous vimentin adopted a peripheral distribution, close to the actin cortex  
170 (Fig. 4A). Primary human fibroblasts showed a rim of cortical vimentin together with loose  
171 vimentin bundles that did not interfere with chromosomes (Fig. 4A and Supplementary Fig. 3).  
172 Therefore, cortical distribution of vimentin in mitosis is cell-type dependent.

173 Importantly, filaments of glial fibrillary acidic protein (GFAP), another type III intermediate  
174 filament protein, also adopted a peripheral distribution in mitotic astrocytoma cells, whereas  
175 desmin showed a predominantly diffuse cytoplasmic staining in mitotic C2C12 myoblasts (Fig.  
176 4B).

177 We then assessed the distribution of vimentin filaments in the presence of pathophysiological  
178 agents known to cause vimentin “collapse”. The inflammatory lipid mediators 4-  
179 hydroxynonenal and prostaglandin A<sub>1</sub> induced vimentin juxtannuclear condensation in  
180 interphase cells, as previously observed<sup>12</sup>. Moreover, they significantly dislodged vimentin  
181 from the mitotic actomyosin cortex (Fig. 4C), according to the central/total vimentin  
182 fluorescence ratio (Fig. 4C). Additionally, expression of a HIV-protease construct (GFP-PR) was  
183 associated with collapse of vimentin filaments into curly juxtannuclear bundles (Fig. 4D),  
184 reminiscent of the vimentin(1-411) distribution. Ritonavir, a reversible HIV-protease inhibitor,  
185 blocked vimentin collapse, whereas its withdrawal allowed fast vimentin condensation,



186 indicating a role for protease activity (Fig. 4D). HIV-protease-induced vimentin accumulations  
187 remained in mitosis and concentrated close to the dividing chromosomes (Fig. 4E). These  
188 results show that various pathophysiological agents cause anomalous vimentin distribution in  
189 mitosis, hampering cortical localization.

#### 190 **5. Vimentin is intimately intertwined with actin at the mitotic cortex.**

191 Analysis of the interaction of vimentin with the actomyosin cortex by superresolution  
192 microscopy (STED) showed vimentin filaments next to the cortex, intermingling with actin at  
193 some points (Fig. 5A, upper two rows) or running between two actin layers (Fig. 5A, lower two  
194 rows). Single section analysis of actin-vimentin co-localization showed a closer connection at  
195 certain locations along the mitotic cortex, suggesting the existence of docking or penetration  
196 sites of vimentin in this structure. Three-dimensional reconstructions revealed a robust basket-  
197 shaped framework of vimentin filaments of diverse orientations (Fig. 5B). Actin formed a  
198 hollow sphere constituted by elongated patches or bundles mostly oriented perpendicularly to  
199 the support surface, as illustrated in the 3D-reconstruction of the cell bottom half (Fig. 5C and  
200 Supplementary video 5). Interestingly, this reconstruction evidences points of vimentin  
201 filament protrusion through the actin cortex (Fig. 5C).

#### 202 **6. Vimentin-actin interplay in mitotic cells**

203 Deeper insight into the vimentin-actin interaction at the mitotic cortex was obtained by the  
204 analyses schematized in Figure 6A. First, we obtained 3D-reconstructions of the cortex of  
205 vimentin-positive and -negative cells, which confirmed that some cells displayed ample  
206 segments of vimentin at the external surface of the cortex, interwoven with actin structures  
207 (Fig. 6B and Supplementary videos 6 and 7). Next, 2D-map projections from the image stacks  
208 were prepared for global visualization and quantitation of the cortex<sup>43</sup> (Fig. 6B). Fluorescence  
209 intensity profiles of these projections illustrated the alternate distribution of actin and  
210 vimentin signals at some points. 2D-maps from vimentin-negative cells presented higher

211 standard deviation of f-actin pixel brightness, indicating wider variations in f-actin distribution  
212 (Fig. 6B). Additionally, we analyzed orthogonal projections of vimentin-positive and -negative  
213 mitotic cells (Fig. 6C). Notably, vimentin filaments could be detected both at the top and  
214 bottom of vimentin-positive cells (Fig. 6C, arrowheads), with a particular enrichment of robust  
215 lattices at the basal layer, next to the substrate. These structures were obviously absent from  
216 non-transfected cells, but also from cells expressing vimentin(1-411), which was frequently  
217 retained close to the inner actin “ring-like” structure (Fig. 6C, inset), clearly detectable in some  
218 cells, which has been involved in spindle positioning<sup>44</sup>. Additionally, the basal vimentin lattice  
219 was associated with a decreased f-actin signal and lower standard deviation of pixel brightness  
220 at this location, suggestive of less polymerized actin structures (Fig. 6C, graph). Altogether,  
221 these results indicate that vimentin may be an important player at the mitotic cortex, exerting  
222 a measurable impact on its characteristics that could influence cell division dynamics.

## 223 **7. Impact of serial C-terminal deletions on vimentin organization and mitotic peripheral** 224 **distribution.**

225 Structural determinants allowing vimentin to reach the cell periphery in mitosis were explored  
226 by analyzing the distribution of mutants bearing several C-terminal deletions (Fig. 7A).  
227 Vimentin(1-423), mimicking the reported HIV-protease cleavage product<sup>23,45,46</sup>, formed curly  
228 bundles in the nuclear vicinity (Fig. 7B), similar to vimentin(1-411). Vimentin(1-423) coiled  
229 bundles mainly remained near the condensed chromosomes in mitosis, either interfering with  
230 the mitotic spindle or located at one of the poles (Fig. 7C). Often, multi-nucleated cells  
231 containing coiled vimentin(1-423), and in some cases DNA, in the space between nuclei were  
232 found (Supplementary Fig. 1), suggesting cytokinetic defects. Time-lapse monitoring of cells  
233 expressing vimentin(1-423) confirmed marked mitotic alterations, including vimentin  
234 asymmetric partitioning, delayed mitosis and cell death (Fig. 7D and Supplementary videos 8

235 and 9). Moreover, vimentin(1-423), was often retained at the cytoplasmic f-actin ring and did  
236 not reach cortical actin (Fig. 7E).

237 Vimentin(1-448) (Fig. 7A), yielded a heterogeneous pattern with both extended filaments and  
238 robust bundles or accumulations (Fig. 7F). These persisted in mitotic cells, sometimes  
239 appearing at basal planes or at the cell periphery (Fig. 7G). Mitotic cells suffered two main  
240 fates: approximately 40% exhibited delayed separation ending in cell death, indicative of  
241 cytokinetic failure, whereas 60% completed mitosis through vimentin asymmetric partition  
242 (Fig. 7H and supplementary videos 10 and 11). Nevertheless, some peripheral filamentous  
243 vimentin could be detected, lying adjacent to the actomyosin cortex (Fig 7I).

244 Finally, a construct with a shorter C-terminal deletion, vimentin(1-459), formed filaments  
245 similar in morphology and extension to those of vimentin wt, although ~18% of the cells also  
246 showed small bundles or curls (Fig. 7J). In mitosis, vimentin(1-459) adopted a mainly peripheral  
247 distribution, although some cells presented filaments intertwined with chromosomes (Fig. 7K).  
248 In time-lapse monitoring (Fig. 7L and supplementary videos 12 and 13), cells lacking vimentin  
249 bundles underwent basically normal mitosis with even vimentin distribution between daughter  
250 cells. Conversely, cells harboring vimentin bundles showed a partial asymmetric distribution,  
251 with one daughter cell receiving most of vimentin(1-459) (Fig. 7L). Vimentin(1-459) coincided  
252 with some segments of the actomyosin cortex, whereas some filaments persisted in the  
253 central area (Fig. 7M). Thus, deletion of the last seven amino acids induces a mild perturbation  
254 of vimentin distribution in mitosis.

255 Taken together, these results reveal that step-wise deletion of the tail gradually impairs  
256 normal vimentin assembly and redistribution in mitosis, with abolishment of mitotic peripheral  
257 localization being observed upon vimentin truncation at L423 or I411.

258

259 **8. Vimentin cortical association in mitosis does not require network formation or full**  
260 **filament assembly.**

261 To discard that lack of cortical association could be due to intense bundling, we used GFP-  
262 vimentin fusion constructs, which do not form full filaments in SW13/cl.2 cells<sup>12</sup>. First, the  
263 organization of GFP-vimentin wt and all the truncated variants was studied (Fig. 8A). GFP-  
264 vimentin wt formed a uniform lattice of squiggles or short filaments<sup>12</sup> (Fig 8A). Conversely,  
265 GFP-vimentin(1-411) could not reach the squiggle stage and formed only bright dots. GFP-  
266 vimentin(1-423) exhibited a mixed pattern consisting of dots, small swirls and occasional short  
267 filaments. Longer constructs, namely, GFP-vimentin(1-448) and GFP-vimentin(1-459) often  
268 presented short filaments or squiggles (Fig. 8A). Thus, GFP-fusion constructs displayed a  
269 gradual sequence-dependent impairment of particle elongation in vimentin-deficient cells,  
270 stressing that even small truncations of the tail domain have a detectable impact (quantitated  
271 in Fig. 8, graph).

272 Most constructs showed little overlap with actin structures in resting cells, with GFP-vimentin  
273 wt, C328S and GFP-vimentin(1-459) displaying more points of contact (Fig. 8B). In cells  
274 arrested in mitosis by mild nocodazole treatment, GFP-vimentin constructs frequently showed  
275 a diffuse background, suggestive of a higher extent of disassembly than untagged vimentin.  
276 Nevertheless, GFP-vimentin wt structures were clearly detected at the mitotic cell cortex co-  
277 localizing with actin (Fig. 8B). In sharp contrast, GFP-vimentin(1-411) dots appeared scattered  
278 throughout the cell. This lack of cortical association cannot be solely attributed to defective  
279 elongation, since dots formed by full-length GFP-vimentin C328S, which is also elongation-  
280 incompetent<sup>12</sup>, relocated to the periphery of mitotic cells (Fig 8B). GFP-vimentin(1-423)  
281 accumulations also failed to associate with the actin cortex, frequently appearing near the  
282 cytoplasmic f-actin ring, whereas > 60% of GFP-vimentin(1-448) dots redistributed to the cell  
283 periphery and cortical localization of GFP-vimentin(1-459) mixed structures was preserved (Fig.

284 8C, graph). Thus, serial tail truncations exert a graded impact on mitotic cortical association,  
285 denoting the importance of the segment 424-448 for this redistribution (Fig. 8D). Moreover,  
286 full filament elongation is not necessary for cortical association since particles formed by  
287 constructs retaining all or most of the tail domain, effectively relocate to the cell periphery.  
288 Nevertheless, a certain degree of assembly seems necessary since neither GFP-vim(412-466)  
289 (completely diffuse) nor the assembly-incompetent vimentin $\Delta$ 3-74 mutant were able to  
290 redistribute to the mitotic cortex (Supplementary Fig. 4).

291 Thus, the tail domain is essential, but not sufficient, for vimentin cortical association in mitosis,  
292 and other structural or conformational factors appear necessary.

293

## 294 **Discussion**

295 Vimentin plays critical functions in cell mechanics<sup>47</sup>. Nevertheless, its role in mitosis is not fully  
296 understood. Here we unveil the robust scaffold formed by vimentin filaments in mitosis in  
297 several cell types. This framework intimately interacts with the actomyosin cortex, intertwining  
298 with actin, and affecting its properties. Several functions can be envisaged for this  
299 arrangement: to yield space for mitotic spindle organization, and, potentially, to modulate the  
300 robustness or stiffness of the mitotic cortex. Therefore, these results warrant the pertinence to  
301 study vimentin, and other intermediate filaments, as players in mitotic cortex dynamics.

302 Vimentin organization in mitosis is cell-type dependent and responds to two main patterns:  
303 formation of a filament “cage” surrounding the mitotic spindle, or disassembly induced by  
304 phosphorylation of N-terminus residues in combination with protein-protein interactions,  
305 reportedly, copolymerization with nestin<sup>48,49,50</sup>. We observed vimentin rearrangements  
306 potentially related to nestin levels, with SW13/cl.2 cells (nestin-negative) retaining filaments,  
307 MCF7 cells (nestin-positive)<sup>51</sup>, showing vimentin disassembly, and mixed patterns in the other

308 cell types which express variable nestin:vimentin proportions<sup>52</sup>. It can be hypothesized that, if  
309 not disassembled, vimentin filaments should undergo mitotic cortical translocation or  
310 anchorage to facilitate mitosis progression. This is substantiated by the striking behavior of  
311 vimentin(1-411), which does not reach the actomyosin cortex and interferes with the mitotic  
312 apparatus causing aberrant mitosis. This raises potential cytotoxic implications of vimentin  
313 cortical dislodgement in pathophysiological settings, as observed upon lipoxidation or C-  
314 terminal cleavage, although damage or cleavage of macromolecules different than vimentin  
315 could contribute to these effects.

316 The intrinsically disordered C-terminal vimentin domain has been proposed to undergo  
317 conformational rearrangements during filament assembly and to participate in protein-protein  
318 interactions, including actin<sup>53,54</sup>. Our results indicate that in mitosis, filamentous vimentin  
319 interacts with the actomyosin cortex showing points of co-localization with actin. However,  
320 this interaction could take place through other proteins, including the scaffold protein plectin,  
321 chaperones or actin-associated proteins<sup>55</sup>. Additionally, vimentin protrudes through the  
322 actomyosin cortex at some points, for which sites of attachment at the plasma membrane  
323 involving protein receptors or lipid domains, cannot be excluded.

324 A complex interplay between actin and vimentin at several organization levels exists in resting  
325 cells<sup>36</sup>. Actin limits transport of vimentin ULF along microtubules<sup>56</sup>, and actomyosin arcs  
326 interact with vimentin filaments through plectin and drive their retrograde movement, thus  
327 promoting vimentin perinuclear localization<sup>37</sup>. In turn, vimentin restricts retrograde  
328 movement of the arcs and restrains actin polymerization and stress fiber assembly<sup>57</sup>.  
329 Nevertheless, the actin-vimentin interaction in mitosis has not been addressed to our  
330 knowledge. The mitotic cortex provides tension, which together with osmotic pressure  
331 controls cell rounding. Actin organization is a key factor in contractile tension generation<sup>58</sup>.  
332 Importantly, our results clearly show that integrity of the actomyosin cortex is necessary for

333 vimentin cortical association, but also suggest an impact of vimentin on cortical actin  
334 organization. The lower dispersion of f-actin signal in global cortex 2D-projections and the  
335 lower intensity at basal planes in vimentin-positive cells suggests a negative feedback on the  
336 formation of highly polymerized actin structures, which in mitotic SW13/cl.2 cells appear  
337 mainly as elongated actin bundles perpendicular to the substrate. Thus, our studies open the  
338 way for dissecting the consequences of vimentin-actin interplay on actomyosin contractility or  
339 stiffness in mitosis<sup>59</sup>.

340 Vimentin tail integrity is determinant for cortical association. On one hand, both untagged and  
341 GFP-fusion constructs show a graded impairment of cortical association upon serial tail  
342 truncations, the strongest impact occurring after deletion of the 43 distal residues. Therefore,  
343 the sequence comprised between residues 424-448, appears to contain important  
344 determinants for mitotic redistribution. This segment approximately coincides with a putative  
345 loop proposed to protrude from filaments and participate in protein-protein interactions<sup>60,61</sup>.  
346 Although this contention still needs conclusive experimental evidence, our results raise the  
347 interest of investigating posttranslational modifications affecting the vimentin tail, which could  
348 modulate cortical association. On the other hand, although vimentin polymerization into full  
349 filaments is not necessary for cortical localization, a certain level of organization appears  
350 necessary since soluble vimentin forms do not undergo cortical association, for which integrity  
351 of the N-terminus could also play a role.

352 Thus, our results, summarized in Supplementary Figure 8, show that vimentin filaments  
353 redistribute to the cell periphery in mitosis in a tail domain-dependent manner. This  
354 reorganization implies a close interplay with the actomyosin cortex, which sets forth novel  
355 functions of intermediate filament dynamics during the cell cycle and opens the way for the  
356 search of strategies modulating these interactions.

357

358

359 **Materials and methods**

360 Reagents. Restriction enzymes and buffers were from Promega. Anti-vimentin antibodies  
361 were: mouse monoclonal V9 clone (sc-6260) and its Alexa-488 conjugate from Santa Cruz  
362 Biotechnology, and mouse anti-vimentin monoclonal antibody (V5255) from Sigma. Anti-actin  
363 (A2066) was from Sigma and anti- $\alpha$ -tubulin (ab52866) and anti-desmin (ab15200-1) from  
364 Abcam. Anti-GFAP (Z0334) was from Dako. C3 transferase toxin was from Cytoskeleton.  
365 Latrunculin A and jasplakinolide were from Santa Cruz Biotechnology. 4-hydroxynonenal (HNE)  
366 and prostaglandin A<sub>1</sub> (PGA<sub>1</sub>) were from Cayman Chemical. 4,6-diamidino-2-phenylindole  
367 (DAPI), blebbistatin and ritonavir were from Sigma.

368 Cell culture and treatments. SW13/cl.2 human adrenocarcinoma vimentin-deficient cells were  
369 the generous gift of Dr. A. Sarriá (University of Zaragoza, Spain)<sup>62</sup>. MCF7 human breast  
370 carcinoma cells, U-373 MG human glioblastoma astrocytoma cells and C2C12 murine  
371 myoblasts were from ATCC. They were cultured in DMEM with 10% (v/v) fetal bovine serum  
372 (FBS) and antibiotics (100 U/ml penicillin and 100  $\mu$ g/ml streptomycin). Bovine aortic  
373 endothelial cells (BAEC) were from Clonetics and were cultured in RPMI1640 supplemented  
374 with 10% (v/v) newborn calf serum (Gibco) and antibiotics. Primary human dermal fibroblasts  
375 from an adult donor (ref. AG10803) were obtained from the NIA Aging Cell Repository at the  
376 Coriell Institute for Medical Research (Camden, NJ). Unless otherwise stated, treatments were  
377 carried out in serum-free medium. For acute microtubule disruption, cells were treated with 5  
378  $\mu$ M nocodazole for 30 min. For mitotic arrest, cells were cultured in the presence of 0.4  $\mu$ M  
379 nocodazole for 20 h in complete medium. This treatment was employed, when indicated, to  
380 increase the proportion of mitotic cells in conditions under which neither actin, nor vimentin  
381 organization were altered with respect to untreated cells (Supplementary Fig. 5). Disruption of  
382 f-actin was achieved by treatment with 10  $\mu$ M cytochalasin B or 2.5  $\mu$ M latrunculin A for 30



383 min, or 2  $\mu\text{g}/\text{ml}$  C3 toxin for 3.5 h. Jasplakinolide was employed at 50 nM for 30 min.

384 Blebbistatin was used at 20  $\mu\text{M}$  for 1 h. For treatment with electrophilic lipids, cells were

385 incubated in the presence of 10  $\mu\text{M}$  HNE for 4 h or 20  $\mu\text{M}$   $\text{PGA}_1$  for 20 h. Inhibition of

386 transfected HIV protease was achieved by incubating the cells in the presence of 10  $\mu\text{M}$

387 ritonavir in serum-containing medium, immediately after transfection. For removal of the

388 inhibitor cells were washed three times with fresh medium with serum, without antibiotics.

389 Plasmids and transfections. The bicistronic plasmid RFP//vimentin wt, coding for the red

390 fluorescent protein DsRed Express2, abbreviated as RFP, and wt human vimentin as separate

391 products, and the GFP fusion constructs, GFP-vimentin wt and GFP-vimentin C328S have been

392 previously described<sup>12,63</sup>. mCherry-vimentin was from Genecopoeia. The various tail truncated

393 mutants, vimentin(1-411), (1-423), (1-448) and (1-459) were generated introducing stop

394 codons at positions 412, 424, 449 and 460, respectively, by site directed mutagenesis of the

395 parent vectors using the Quikchange XL mutagenesis kit from Stratagene and the primers

396 specified in Supplementary Table 1, following the instructions of the manufacturer. Truncated

397 vimentin constructs showed the expected mobility in SDS-PAGE gels as well as

398 immunoreactivity (Supplementary Fig. 6A). Thus, all constructs used were recognized by an

399 antibody raised against full-length vimentin, which recognizes the N-terminus of the protein

400 (anti-vim N-term), whereas an antibody against the beginning of the tail (clone V9) recognized

401 all constructs except tailless vimentin(1-411). The GFP-vimentin(412-466) construct, encoding

402 the vimentin tail domain fused with GFP, was constructed in two steps; first, an additional

403 EcoRI site was introduced in the GFP-vimentin wt plasmid (containing the vimentin sequence

404 cloned between the EcoRI and BamHI sites) at a position equivalent to 1692 of the vimentin

405 mRNA sequence (accession number NM\_03380.4); then, the plasmid was digested with EcoRI

406 and re-ligated, using the Ligafast system from Promega, thus eliminating the sequence

407 corresponding to vimentin residues 1 to 411. The assembly-incompetent construct

408 RFP//vimentin $\Delta$ 3-74 was generated by introducing a SmaI site at a position equivalent to 471

409 of the vimentin mRNA sequence in the RFP//vimentin wt plasmid through site-directed  
410 mutagenesis. The resulting mutant plasmid was digested with *Sma*I and re-ligated resulting in  
411 the removal of nucleotides 472 through 687, thus eliminating residues 3 to 74. The CFP-lamin  
412 A plasmid was the gift of Dr. Vicente Andrés<sup>64</sup>. The vector encoding GFP-tagged HIV type I  
413 protease (pcDNA3/GFP-PR) described in<sup>65</sup> was a gift from Nico Dantuma (Addgene plasmid  
414 #20253). Cells were transfected using Lipofectamine 2000 (Thermo Scientific), as previously  
415 described<sup>12,66</sup>. Typically, 1 µg of DNA and 3 µl of Lipofectamine 2000 were used per p35 dish.  
416 For overexpression of RFP//vimentin wt or (1-411) in U-373 MG astrocytoma cells, 2 µg of DNA  
417 plus 4.5 µl of Lipofectamine 2000 were used. For expression of different proportions of  
418 vimentin wt and tailless (1-411), the following plasmid amounts were used: 10:0, 0.8 µg  
419 RFP//vim wt + 0.2 µg GFP-vim wt; 8:2, 0.8 µg RFP//vim wt + 0.2 µg GFP-vim(1-411); 4:6, 0.4 µg  
420 RFP//vim wt + 0.4 µg RFP//vim(1-411) + 0.2 µg GFP-vim(1-411); 2:8, 0.2 µg RFP//vim wt + 0.6  
421 µg RFP//vim(1-411) + 0.2 µg GFP-vim(1-411). Routinely, cells were visualized 48 h after  
422 transient transfection. When indicated, cells were cultured in the presence of 500 µg/ml G-418  
423 for generation of stably transfected cells.

424 Fluorescence microscopy and image analysis. Cells transfected with the various constructs  
425 were visualized live by confocal microscopy on Leica SP2 or SP5 microscopes. Images were  
426 acquired every 0.5 µm and single sections or overall projections are shown, as indicated. All  
427 scale bars are 20 µm. For immunofluorescence, cells were fixed with 4% (w/v)  
428 paraformaldehyde for 25 min at r.t., permeabilized with 0.1% (v/v) Triton-X100 in PBS and  
429 blocked with 1% (w/v) BSA in PBS. Antibodies were used at 1:200 dilution in blocking solution.  
430 For experiments involving detection of vimentin(1-411), the monoclonal antibody recognizing  
431 the vimentin N-terminus was used for all conditions. For experiments involving selective  
432 detection of full-length vimentin or not requiring a comparison with vimentin(1-411), the V9  
433 antibody was employed (Supplementary Fig. 6B). F-actin was stained with Phalloidin-Alexa568

434 or Phalloidin-Alexa488 (Molecular Probes), following the manufacturer instructions. Nuclei  
435 were counterstained with DAPI (3 µg/ml). Direct visualization on glass-bottom culture dishes  
436 was found optimal for imaging mitotic cells, since mounting on glass slides compromised their  
437 spherical shape. For superresolution microscopy through stimulated emission depletion  
438 (STED), vimentin was detected with Alexa488-conjugated anti-vimentin V9 and f-actin was  
439 stained with Phalloidin-Tetramethylrhodamine B isothiocyanate from Sigma (0.25 µg/ml).  
440 Images were acquired with a confocal multispectral Leica TCS SP8 system equipped with a 3X  
441 STED module. Co-localization was analyzed with Leica software. Time-lapse microscopy was  
442 carried out in a multidimensional microscopy system Leica AF6000 LX in a humidified 5% CO<sub>2</sub>  
443 atmosphere at 37°C. Typically, green fluorescence and differential interference contrast (DIC)  
444 images were recorded. 3D-reconstructions were obtained with Image J (FIJI), Imaris or Leica  
445 software. Fluorescence intensity profiles and measurements of mean fluorescence intensity  
446 and standard deviation of pixel brightness values, to illustrate the dispersion of f-actin  
447 intensity, were obtained with ImageJ. Orthogonal projections were obtained with Leica  
448 software. 2D maps from image stacks were obtained by FIJI and the free Map3-2D software  
449 developed by Sendra et al.,<sup>43</sup>  
450 ([http://www.zmbh.uniheidelberg.de//Central\\_Services/Imaging\\_Facility/Map3-2D.html](http://www.zmbh.uniheidelberg.de//Central_Services/Imaging_Facility/Map3-2D.html)),  
451 which unfolds surface information onto a single structurally connected map, using a “sphere”  
452 adjustment. For quantitation of vimentin reorganization induced by electrophilic lipids, the  
453 proportion of vimentin fluorescence present in the central area of mitotic cells (central circle  
454 of a diameter of 60% the total cell diameter in a single section at mid-cell height), with respect  
455 to the total area was measured as an indication of the impairment of peripheral distribution.

456 SDS-PAGE and western blot. Cells transfected with the various constructs were lysed in 20 mM  
457 Tris-HCl pH 7.5, 0.1 mM EDTA, 0.1 mM EGTA, 0.1 mM β-mercaptoethanol, containing 0.5%  
458 (w/v) SDS, 0.1 mM sodium orthovanadate and protease inhibitors (2 µg/ml each of leupeptin,  
459 aprotinin and trypsin inhibitor, and 1.3 mM Pefablock), and processed essentially as described

460 <sup>67</sup>. Briefly, protein concentration in lysates was determined by the bicinchoninic acid assay.  
461 Aliquots of lysates containing 30 µg of total protein were denatured in Laemmli buffer for 5  
462 min at 95°C and separated in 10 or 15% SDS-polyacrylamide gels. Gels were transferred to  
463 Immobilon-P membranes (Millipore) using a Tris-glycine methanol three-buffer system, as  
464 recommended by the manufacturer, on a semi-dry transfer unit (Transblot) from Bio-Rad.  
465 Membranes were blocked with 2% (w/v) low-fat powdered milk in T-TBS (Tris-HCl pH 7.5, 500  
466 mM NaCl, 0.05% (v/v) Tween-20). Subsequently, membranes were incubated with primary  
467 antibodies at 1:500 dilution and horseradish peroxidase-conjugated secondary antibodies  
468 (Dako) at 1:2000 dilution. Proteins of interest were detected with the ECL system from GE  
469 Healthcare.

470 Statistical analysis. All experiments were repeated at least three times with similar results. All  
471 results are presented as average values ± SEM. Statistical analysis was performed with  
472 GraphPad Prism. Statistical differences were evaluated by the unpaired Student's *t*-test and  
473 were considered significant when  $P < 0.05$ , which is denoted in graphs by an asterisk. The  
474 significance levels for every experiment are given in the figure legends.

475

476 **Acknowledgements.** This work has been funded by the European Union's Horizon 2020  
477 research and innovation program under the Marie Skłodowska-Curie grant agreement  
478 number 675132, "Masstrplan" ([http://cordis.europa.eu/project/rcn/198275\\_en.html](http://cordis.europa.eu/project/rcn/198275_en.html)), and by  
479 grants from the Spanish Ministerio de Economía y Competitividad (MINECO/FEDER,  
480 <http://www.mineco.gob.es/portal/site/mineco/idi>) SAF2015-68590R and from Instituto de  
481 Salud Carlos III/FEDER, RETIC Aradyal RD16/0006/0021. AVP is supported by the FPI Program  
482 from MINECO, reference: BES-2016-076965. Feedback from the EU COST Action CA15214  
483 "EuroCellNet" is gratefully acknowledged.

484 We are indebted to MT Seisdedos and Dr. G Elvira from CIB, and Dr. S Gutiérrez from CNB, CSIC  
485 for help with confocal and superresolution microscopy, respectively. We thank Dr. Francisco J.  
486 Sánchez-Gómez and Prof. F.J. Cañada for helpful comments and discussion. The valuable  
487 technical assistance of MJ Carrasco is gratefully appreciated.

488

## 489 **References**

- 490 1 Guo, M. *et al.* Probing the stochastic, motor-driven properties of the cytoplasm using  
491 force spectrum microscopy. *Cell* **158**, 822-832, doi:10.1016/j.cell.2014.06.051 (2014).
- 492 2 Styers, M. L. *et al.* The endo-lysosomal sorting machinery interacts with the  
493 intermediate filament cytoskeleton. *Mol Biol Cell* **15**, 5369-5382,  
494 doi:10.1091/mbc.E04-03-0272 (2004).
- 495 3 Chernouvanenko, I. S., Matveeva, E. A., Gelfand, V. I., Goldman, R. D. & Minin, A. A.  
496 Mitochondrial membrane potential is regulated by vimentin intermediate filaments.  
497 *FASEB J* **29**, 820-827, doi:10.1096/fj.14-259903 (2015).
- 498 4 Bhattacharya, R. *et al.* Recruitment of vimentin to the cell surface by beta3 integrin  
499 and plectin mediates adhesion strength. *J Cell Sci* **122**, 1390-1400,  
500 doi:10.1242/jcs.043042 (2009).
- 501 5 Kim, J. *et al.* Vimentin filaments regulate integrin-ligand interactions by binding to the  
502 cytoplasmic tail of integrin beta3. *J Cell Sci* **129**, 2030-2042, doi:10.1242/jcs.180315  
503 (2016).
- 504 6 Lee, J. S. *et al.* Heat shock protein 27 interacts with vimentin and prevents  
505 insolubilization of vimentin subunits induced by cadmium. *Exp Mol Med* **37**, 427-435,  
506 doi:10.1038/emm.2005.53 (2005).

- 507 7 Zhang, M. H. *et al.* HSP90 protects apoptotic cleavage of vimentin in geldanamycin-  
508 induced apoptosis. *Mol Cell Biochem* **281**, 111-121, doi:10.1007/s11010-006-0638-x  
509 (2006).
- 510 8 Chang, L. & Goldman, R. D. Intermediate filaments mediate cytoskeletal crosstalk. *Nat*  
511 *Rev Mol Cell Biol* **5**, 601-613, doi:10.1038/nrm1438 (2004).
- 512 9 Kim, H. *et al.* Regulation of cell adhesion to collagen via  $\beta$ 1 integrins is dependent on  
513 interactions of filamin A with vimentin and protein kinase C epsilon. *Exp Cell Res* **316**,  
514 1829-1844 (2010).
- 515 10 de Pablo, Y., Nilsson, M., Pekna, M. & Pekny, M. Intermediate filaments are important  
516 for astrocyte response to oxidative stress induced by oxygen-glucose deprivation and  
517 reperfusion. *Histochem Cell Biol* **140**, 81-91, doi:10.1007/s00418-013-1110-0 (2013).
- 518 11 Robert, A., Rossow, M. J., Hookway, C., Adam, S. A. & Gelfand, V. I. Vimentin filament  
519 precursors exchange subunits in an ATP-dependent manner. *Proc Natl Acad Sci U S A*  
520 **112**, E3505-3514, doi:10.1073/pnas.1505303112 (2015).
- 521 12 Pérez-Sala, D. *et al.* Vimentin filament organization and stress sensing depend on its  
522 single cysteine residue and zinc binding. *Nat Commun* **6**, 7287,  
523 doi:10.1038/ncomms8287 (2015).
- 524 13 Snider, N. T. & Omary, M. B. Post-translational modifications of intermediate filament  
525 proteins: mechanisms and functions. *Nat Rev Mol Cell Biol* **15**, 163-177,  
526 doi:10.1038/nrm3753 (2014).
- 527 14 Sihag, R. K., Inagaki, M., Yamaguchi, T., Shea, T. B. & Pant, H. C. Role of  
528 phosphorylation on the structural dynamics and function of types III and IV  
529 intermediate filaments. *Exp Cell Res* **313**, 2098-2109, doi:10.1016/j.yexcr.2007.04.010  
530 (2007).
- 531 15 Zhu, Q. S. *et al.* Vimentin is a novel AKT1 target mediating motility and invasion.  
532 *Oncogene* **30**, 457-470, doi:10.1038/onc.2010.421 (2011).

- 533 16 Chou, Y. H., Khuon, S., Herrmann, H. & Goldman, R. D. Nestin promotes the  
534 phosphorylation-dependent disassembly of vimentin intermediate filaments during  
535 mitosis. *Mol Biol Cell* **14**, 1468-1478, doi:10.1091/mbc.E02-08-0545 (2003).
- 536 17 Izawa, I. & Inagaki, M. Regulatory mechanisms and functions of intermediate  
537 filaments: a study using site- and phosphorylation state-specific antibodies. *Cancer Sci*  
538 **97**, 167-174, doi:10.1111/j.1349-7006.2006.00161.x (2006).
- 539 18 Mohan, R. & Bargagna-Mohan, P. The Use of Withaferin A to Study Intermediate  
540 Filaments. *Methods Enzymol* **568**, 187-218, doi:10.1016/bs.mie.2015.09.025 (2016).
- 541 19 Traub, P. & Vorgias, C. E. Involvement of the N-terminal polypeptide of vimentin in the  
542 formation of intermediate filaments. *J Cell Sci* **63**, 43-67 (1983).
- 543 20 Perlson, E. *et al.* Vimentin-dependent spatial translocation of an activated MAP kinase  
544 in injured nerve. *Neuron* **45**, 715-726, doi:10.1016/j.neuron.2005.01.023 (2005).
- 545 21 Byun, Y. *et al.* Caspase cleavage of vimentin disrupts intermediate filaments and  
546 promotes apoptosis. *Cell Death Differ* **8**, 443-450, doi:10.1038/sj.cdd.4400840 (2001).
- 547 22 Singh, B. & Arlinghaus, R. B. Vimentin phosphorylation by p37mos protein kinase in  
548 vitro and generation of a 50-kDa cleavage product in v-mos-transformed cells. *Virology*  
549 **173**, 144-156 (1989).
- 550 23 Shoeman, R. L. *et al.* Human immunodeficiency virus type 1 protease cleaves the  
551 intermediate filament proteins vimentin, desmin, and glial fibrillary acidic protein. *Proc*  
552 *Natl Acad Sci U S A* **87**, 6336-6340 (1990).
- 553 24 Yue, Q. *et al.* Proteomic Analysis Revealed the Important Role of Vimentin in Human  
554 Cervical Carcinoma HeLa Cells Treated With Gambogic Acid. *Mol Cell Proteomics* **15**,  
555 26-44, doi:10.1074/mcp.M115.053272 (2016).
- 556 25 Eckelt, A., Herrmann, H. & Franke, W. W. Assembly of a tail-less mutant of the  
557 intermediate filament protein, vimentin, in vitro and in vivo. *Eur J Cell Biol* **58**, 319-330  
558 (1992).

- 559 26 McCormick, M. B., Kouklis, P., Syder, A. & Fuchs, E. The roles of the rod end and the tail  
560 in vimentin IF assembly and IF network formation. *J Cell Biol* **122**, 395-407 (1993).
- 561 27 Rogers, K. R. *et al.* Truncation mutagenesis of the non-alpha-helical carboxyterminal  
562 tail domain of vimentin reveals contributions to cellular localization but not to filament  
563 assembly. *Eur J Cell Biol* **66**, 136-150 (1995).
- 564 28 Mucke, N. *et al.* Molecular and biophysical characterization of assembly-starter units  
565 of human vimentin. *J Mol Biol* **340**, 97-114, doi:10.1016/j.jmb.2004.04.039 (2004).
- 566 29 Herrmann, H. *et al.* Structure and assembly properties of the intermediate filament  
567 protein vimentin: the role of its head, rod and tail domains. *J Mol Biol* **264**, 933-953,  
568 doi:10.1006/jmbi.1996.0688 (1996).
- 569 30 Hess, J. F., Budamagunta, M. S., Aziz, A., FitzGerald, P. G. & Voss, J. C. Electron  
570 paramagnetic resonance analysis of the vimentin tail domain reveals points of order in  
571 a largely disordered region and conformational adaptation upon filament assembly.  
572 *Protein Sci* **22**, 47-55, doi:10.1002/pro.2182 (2013).
- 573 31 Lin, Y. C. *et al.* Divalent cations crosslink vimentin intermediate filament tail domains  
574 to regulate network mechanics. *J Mol Biol* **399**, 637-644,  
575 doi:10.1016/j.jmb.2010.04.054 (2010).
- 576 32 Lowrie, D. J., Jr., Stickney, J. T. & Ip, W. Properties of the nonhelical end domains of  
577 vimentin suggest a role in maintaining intermediate filament network structure. *J*  
578 *Struct Biol* **132**, 83-94, doi:10.1006/jsbi.2000.4315 (2000).
- 579 33 Griesser, E., Barayeu, U., Flemmig, J., Pérez-Sala, D. & Fedorova, M. Uncovering the  
580 diversity of redox proteoforms and their significance in cellular signaling and protein-  
581 protein interactions. *Free Rad Biol Med* **120**, S67,  
582 doi:<http://dx.doi.org/10.1016/j.freeradbiomed.2018.04.221> (2018).
- 583 34 Kunda, P. & Baum, B. The actin cytoskeleton in spindle assembly and positioning.  
584 *Trends Cell Biol* **19**, 174-179, doi:10.1016/j.tcb.2009.01.006 (2009).



- 585 35 Salbreux, G., Charras, G. & Paluch, E. Actin cortex mechanics and cellular  
586 morphogenesis. *Trends Cell Biol* **22**, 536-545, doi:10.1016/j.tcb.2012.07.001 (2012).
- 587 36 Huber, F., Boire, A., Lopez, M. P. & Koenderink, G. H. Cytoskeletal crosstalk: when  
588 three different personalities team up. *Curr Opin Cell Biol* **32**, 39-47,  
589 doi:10.1016/j.ceb.2014.10.005 (2015).
- 590 37 Jiu, Y. *et al.* Bidirectional Interplay between Vimentin Intermediate Filaments and  
591 Contractile Actin Stress Fibers. *Cell Rep* **11**, 1511-1518,  
592 doi:10.1016/j.celrep.2015.05.008 (2015).
- 593 38 Rosa, A., Vlassaks, E., Pichaud, F. & Baum, B. Ect2/Pbl acts via Rho and polarity proteins  
594 to direct the assembly of an isotropic actomyosin cortex upon mitotic entry. *Dev Cell*  
595 **32**, 604-616, doi:10.1016/j.devcel.2015.01.012 (2015).
- 596 39 Ramanathan, S. P. *et al.* Cdk1-dependent mitotic enrichment of cortical myosin II  
597 promotes cell rounding against confinement. *Nat Cell Biol* **17**, 148-159,  
598 doi:10.1038/ncb3098 (2015).
- 599 40 Heng, Y. W. & Koh, C. G. Actin cytoskeleton dynamics and the cell division cycle. *Int J*  
600 *Biochem Cell Biol* **42**, 1622-1633, doi:10.1016/j.biocel.2010.04.007 (2010).
- 601 41 Lambert, M. *et al.* Nucleation and growth of cadherin adhesions. *Exp Cell Res* **313**,  
602 4025-4040, doi:10.1016/j.yexcr.2007.07.035 (2007).
- 603 42 Liu, Z. *et al.* Blebbistatin inhibits contraction and accelerates migration in mouse  
604 hepatic stellate cells. *Br J Pharmacol* **159**, 304-315, doi:10.1111/j.1476-  
605 5381.2009.00477.x (2010).
- 606 43 Sendra, G. H., Hoerth, C. H., Wunder, C. & Lorenz, H. 2D map projections for  
607 visualization and quantitative analysis of 3D fluorescence micrographs. *Sci Rep* **5**,  
608 12457, doi:10.1038/srep12457 (2015).

- 609 44 Lu, H. *et al.* Characterization of ring-like F-actin structure as a mechanical partner for  
610 spindle positioning in mitosis. *PLoS One* **9**, e102547,  
611 doi:10.1371/journal.pone.0102547 (2014).
- 612 45 Konvalinka, J. *et al.* An active-site mutation in the human immunodeficiency virus type  
613 1 proteinase (PR) causes reduced PR activity and loss of PR-mediated cytotoxicity  
614 without apparent effect on virus maturation and infectivity. *J Virol* **69**, 7180-7186  
615 (1995).
- 616 46 Honer, B., Shoeman, R. L. & Traub, P. Human immunodeficiency virus type 1 protease  
617 microinjected into cultured human skin fibroblasts cleaves vimentin and affects  
618 cytoskeletal and nuclear architecture. *J Cell Sci* **100 ( Pt 4)**, 799-807 (1991).
- 619 47 Sanghvi-Shah, R. & Weber, G. F. Intermediate Filaments at the Junction of  
620 Mechanotransduction, Migration, and Development. *Front Cell Develop Biol* **5**, 81,  
621 doi:10.3389/fcell.2017.00081 (2017).
- 622 48 Djabali, K., Piron, G., de Nechaud, B. & Portier, M. M. alphaB-crystallin interacts with  
623 cytoplasmic intermediate filament bundles during mitosis. *Exp Cell Res* **253**, 649-662,  
624 doi:10.1006/excr.1999.4679 (1999).
- 625 49 Matsuyama, M. *et al.* Defect of mitotic vimentin phosphorylation causes  
626 microphthalmia and cataract via aneuploidy and senescence in lens epithelial cells. *J*  
627 *Biol Chem* **288**, 35626-35635, doi:10.1074/jbc.M113.514737 (2013).
- 628 50 Sahlgren, C. M. *et al.* Mitotic reorganization of the intermediate filament protein  
629 nestin involves phosphorylation by cdc2 kinase. *J Biol Chem* **276**, 16456-16463,  
630 doi:10.1074/jbc.M009669200 (2001).
- 631 51 Meisen, W. H. *et al.* Changes in BAI1 and nestin expression are prognostic indicators  
632 for survival and metastases in breast cancer and provide opportunities for dual  
633 targeted therapies. *Mol Cancer Ther* **14**, 307-314, doi:10.1158/1535-7163.MCT-14-  
634 0659 (2015).

- 635 52 Leduc, C. & Etienne-Manneville, S. Regulation of microtubule-associated motors drives  
636 intermediate filament network polarization. *J Cell Biol* **216**, 1689-1703,  
637 doi:10.1083/jcb.201607045 (2017).
- 638 53 Esue, O., Carson, A. A., Tseng, Y. & Wirtz, D. A direct interaction between actin and  
639 vimentin filaments mediated by the tail domain of vimentin. *J Biol Chem* **281**, 30393-  
640 30399, doi:10.1074/jbc.M605452200 (2006).
- 641 54 Cary, R. B. *et al.* Vimentin's tail interacts with actin-containing structures in vivo. *J Cell*  
642 *Sci* **107**, 1609-1622 (1994).
- 643 55 Wiche, G. & Winter, L. Plectin isoforms as organizers of intermediate filament  
644 cytoarchitecture. *Bioarchitecture* **1**, 14-20, doi:10.4161/bioa.1.1.14630 (2011).
- 645 56 Robert, A., Herrmann, H., Davidson, M. W. & Gelfand, V. I. Microtubule-dependent  
646 transport of vimentin filament precursors is regulated by actin and by the concerted  
647 action of Rho- and p21-activated kinases. *FASEB J* **28**, 2879-2890, doi:10.1096/fj.14-  
648 250019 (2014).
- 649 57 Jiu, Y. *et al.* Vimentin intermediate filaments control actin stress fiber assembly  
650 through GEF-H1 and RhoA. *J Cell Sci* **130**, 892-902, doi:10.1242/jcs.196881 (2017).
- 651 58 Koenderink, G. H. & Paluch, E. K. Architecture shapes contractility in actomyosin  
652 networks. *Curr Opin Cell Biol* **50**, 79-85, doi:10.1016/j.ceb.2018.01.015 (2018).
- 653 59 Cadart, C., Zlotek-Zlotkiewicz, E., Le Berre, M., Piel, M. & Matthews, H. K. Exploring the  
654 function of cell shape and size during mitosis. *Dev Cell* **29**, 159-169,  
655 doi:10.1016/j.devcel.2014.04.009 (2014).
- 656 60 Kouklis, P. D., Papamarcaki, T., Merdes, A. & Georgatos, S. D. A potential role for the  
657 COOH-terminal domain in the lateral packing of type III intermediate filaments. *J Cell*  
658 *Biol* **114**, 773-786 (1991).

- 659 61 Kornreich, M., Avinery, R., Malka-Gibor, E., Laser-Azogui, A. & Beck, R. Order and  
660 disorder in intermediate filament proteins. *FEBS Lett* **589**, 2464-2476,  
661 doi:10.1016/j.febslet.2015.07.024 (2015).
- 662 62 Sarria, A. J., Lieber, J. G., Nordeen, S. K. & Evans, R. M. The presence or absence of a  
663 vimentin-type intermediate filament network affects the shape of the nucleus in  
664 human SW-13 cells. *J Cell Sci* **107**, 1593-1607 (1994).
- 665 63 Stamatakis, K., Sánchez-Gómez, F. J. & Pérez-Sala, D. Identification of novel protein  
666 targets for modification by 15-deoxy- $\Delta^{12,14}$ -prostaglandin J<sub>2</sub> in mesangial cells reveals  
667 multiple interactions with the cytoskeleton. *J Am Soc Nephrol* **17**, 89-98 (2006).
- 668 64 Ivorra, C. *et al.* A mechanism of AP-1 suppression through interaction of c-Fos with  
669 lamin A/C. *Genes Dev* **20**, 307-320 (2006).
- 670 65 Lindsten, K., Uhlikova, T., Konvalinka, J., Masucci, M. G. & Dantuma, N. P. Cell-based  
671 fluorescence assay for human immunodeficiency virus type 1 protease activity.  
672 *Antimicrob Agents Chemother* **45**, 2616-2622 (2001).
- 673 66 Viedma-Poyatos, Á., Pablo, Y. d., Pekny, M. & Pérez-Sala, D. The cysteine residue of  
674 glial fibrillary acidic protein is a critical target for lipoxidation and required for efficient  
675 network organization. *Free Rad Biol Med* **120**, 380-394,  
676 doi:10.1016/j.freeradbiomed.2018.04.007 (2018).
- 677 67 Gharbi, S., Garzón, B., Gayarre, J., Timms, J. & Pérez-Sala, D. Study of protein targets  
678 for covalent modification by the antitumoral and anti-inflammatory prostaglandin  
679 PGA<sub>1</sub>: focus on vimentin. *J Mass Spectrom* **42**, 1474-1484 (2007).

680

681

682

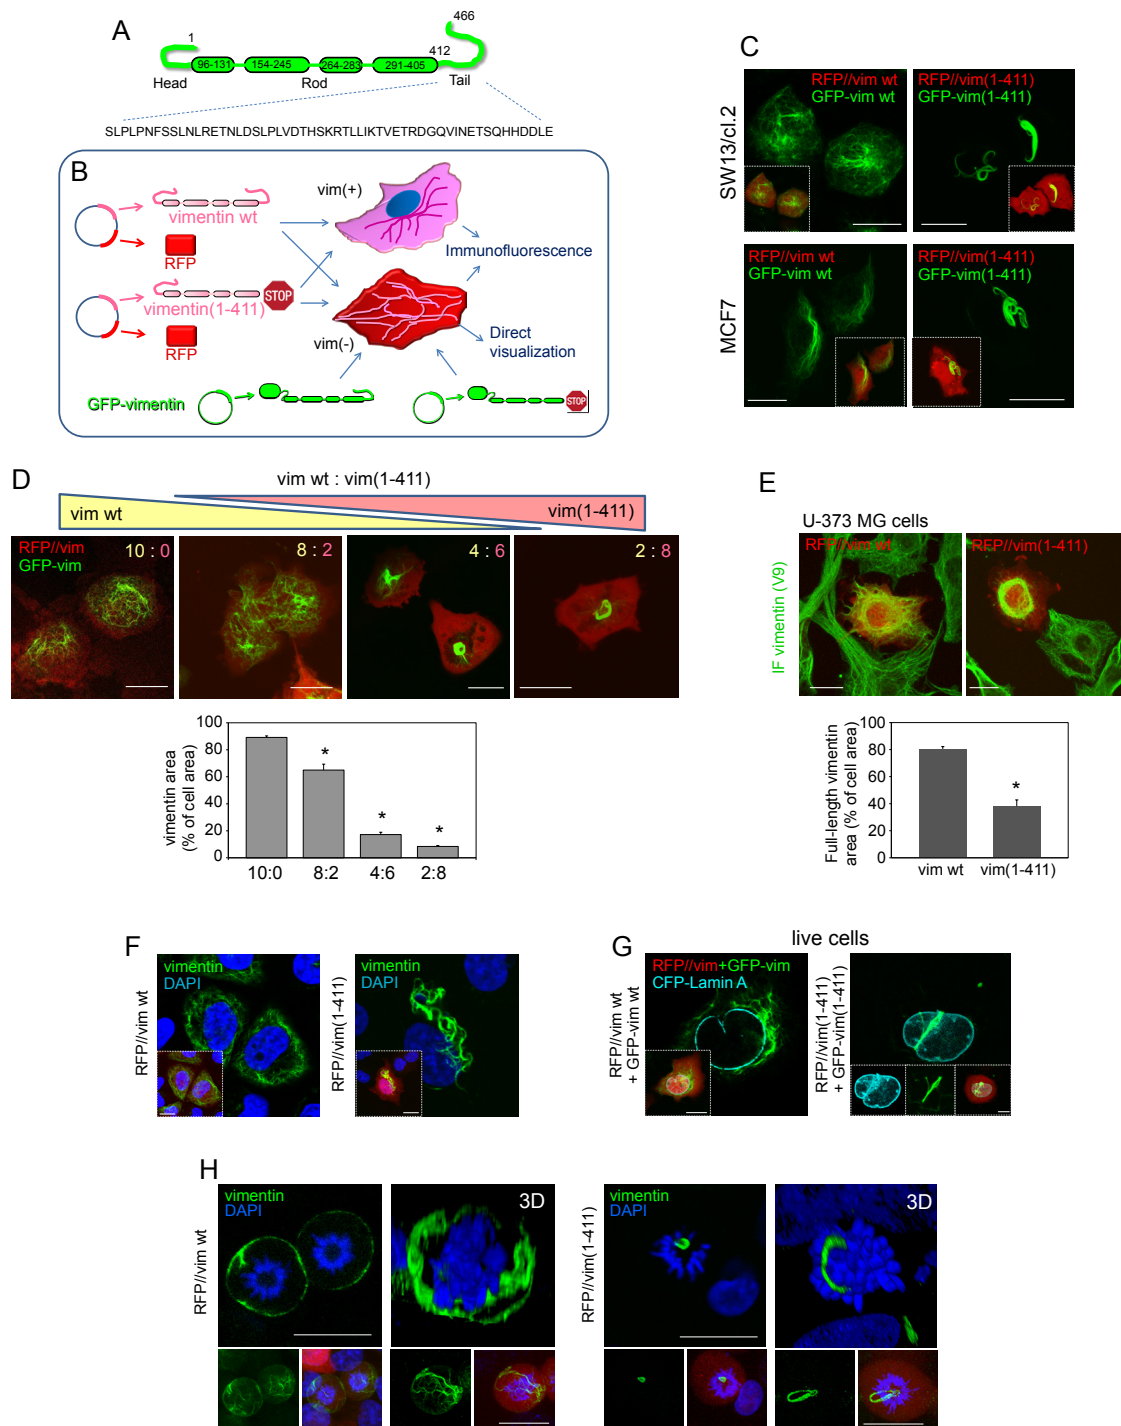

683

684 Fig. 1. Tailless vimentin(1-411) disrupts wt vimentin distribution and interferes with  
 685 chromosomes in mitosis. (A) Schematic view of vimentin domains. Residues are numbered.  
 686 The tail domain sequence is displayed in full. (B) Scheme showing the experimental strategies:  
 687 bicistronic plasmids coding for DsRed2 fluorescent protein (RFP) and vimentin wt (RFP//vim  
 688 wt) or tailless (residues 1-411) (RFP//vim(1-411)) were transfected into vimentin expressing

689 cells (vim +) or vimentin-deficient cells (vim -), alone, for detection by immunofluorescence, or  
690 together with a small amount of the corresponding GFP-vimentin construct (GFP-vim) for  
691 direct visualization. (C) SW13/cl.2 human adrenocarcinoma or MCF7 breast carcinoma cells  
692 transfected with the indicated constructs were observed live 48 h later. (D) SW13/cl.2 cells  
693 were transfected with different proportions of constructs coding for vimentin wild type (wt,  
694 yellow) or tailless (1-411, pink), as detailed in Materials and Methods. Vimentin condensation  
695 was measured as the area occupied by vimentin (green fluorescence) with respect to the total  
696 cellular area (red background). The histogram shows average values  $\pm$  SEM of twenty  
697 determinations.  $*P < 0.05$  by Student's *t*-test. (E) U-373 MG astrocytoma cells were transfected  
698 with RFP//vimentin wt or RFP//vimentin(1-411). Full-length vimentin condensation was  
699 assessed by immunofluorescence with V9 anti-vimentin antibody, which recognizes the tail  
700 domain (green), and estimated as the ratio between the green signal area and the total cell  
701 area (red). The histogram shows average values  $\pm$  SEM of twenty determinations.  $*P < 0.001$  by  
702 Student's *t*-test. (F) SW13/cl.2 cells were transfected with RFP//vimentin wt or (1-411) and  
703 vimentin distribution was assessed by immunofluorescence. Nuclei were counterstained with  
704 DAPI and single overlay sections are shown. (G) Cells were visualized live after transfection  
705 with GFP-vimentin wt or GFP-vimentin(1-411) plus CFP-lamin A to delimit the nuclear  
706 envelope. Insets in (F) and (G) display overall projections of merged images or individual  
707 channels. (H) Cells were transfected with RFP//vimentin wt or (1-411) and vimentin  
708 distribution in mitosis was observed by immunofluorescence. Single sections taken at mid-cell  
709 height (left images) and 3D-projections (right images) are shown. Small panels below each  
710 image depict overall projections for vimentin alone (left) or for the three channels (vimentin,  
711 RFP and DAPI). Scale bars, 20  $\mu$ m.

712

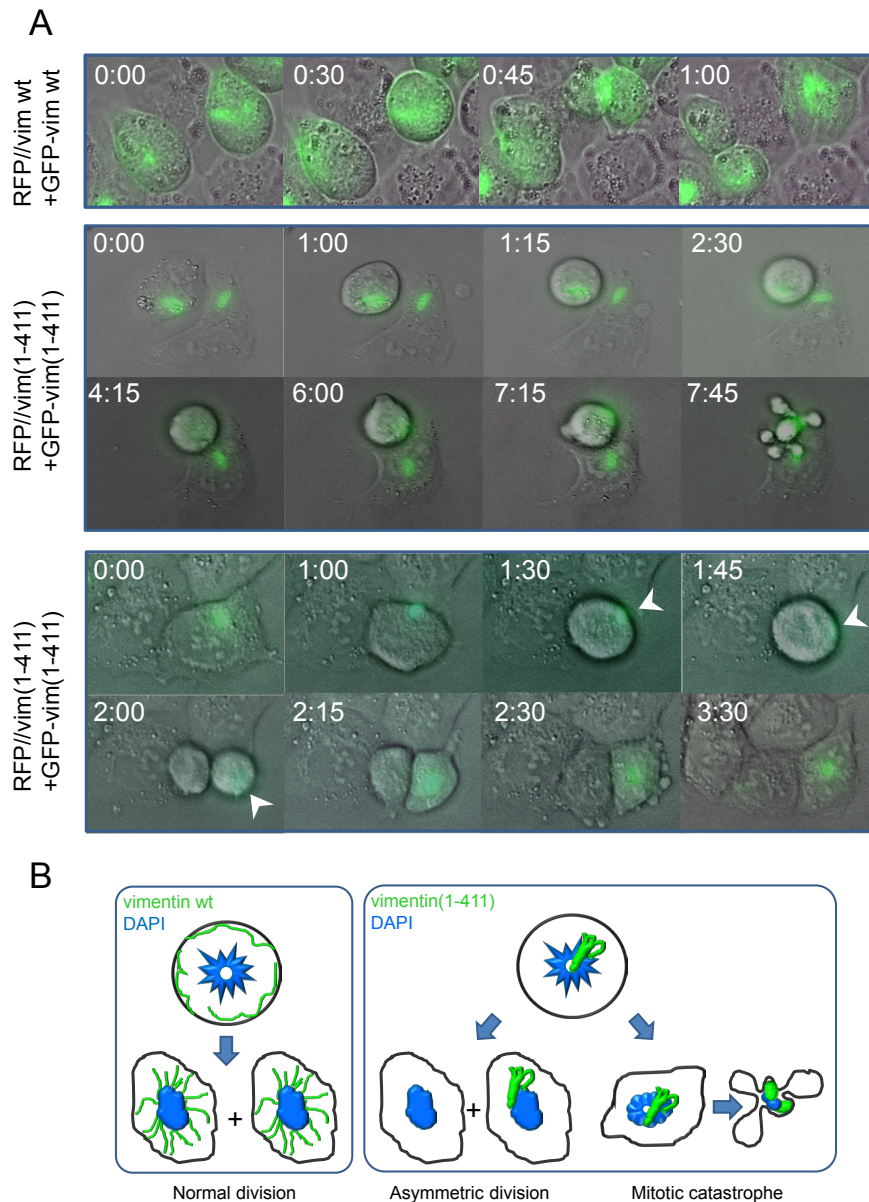

713

714 **Fig. 2. Live cell monitoring of cells expressing vimentin wt or vimentin(1-411) during mitosis.**

715 (A) SW13/cl.2 cells were transfected with RFP//vimentin plus GFP-vimentin wt or (1-411), or

716 the equivalent constructs for vimentin(1-411), as indicated, for live cell monitoring by time-

717 lapse microscopy. Several fields were randomly selected and images were acquired every 15

718 min. Representative images of the overlays of DIC and green fluorescence at the indicated

719 time points are shown. (B) Schematic representation of the main fates observed for cells

720 transfected with each construct.

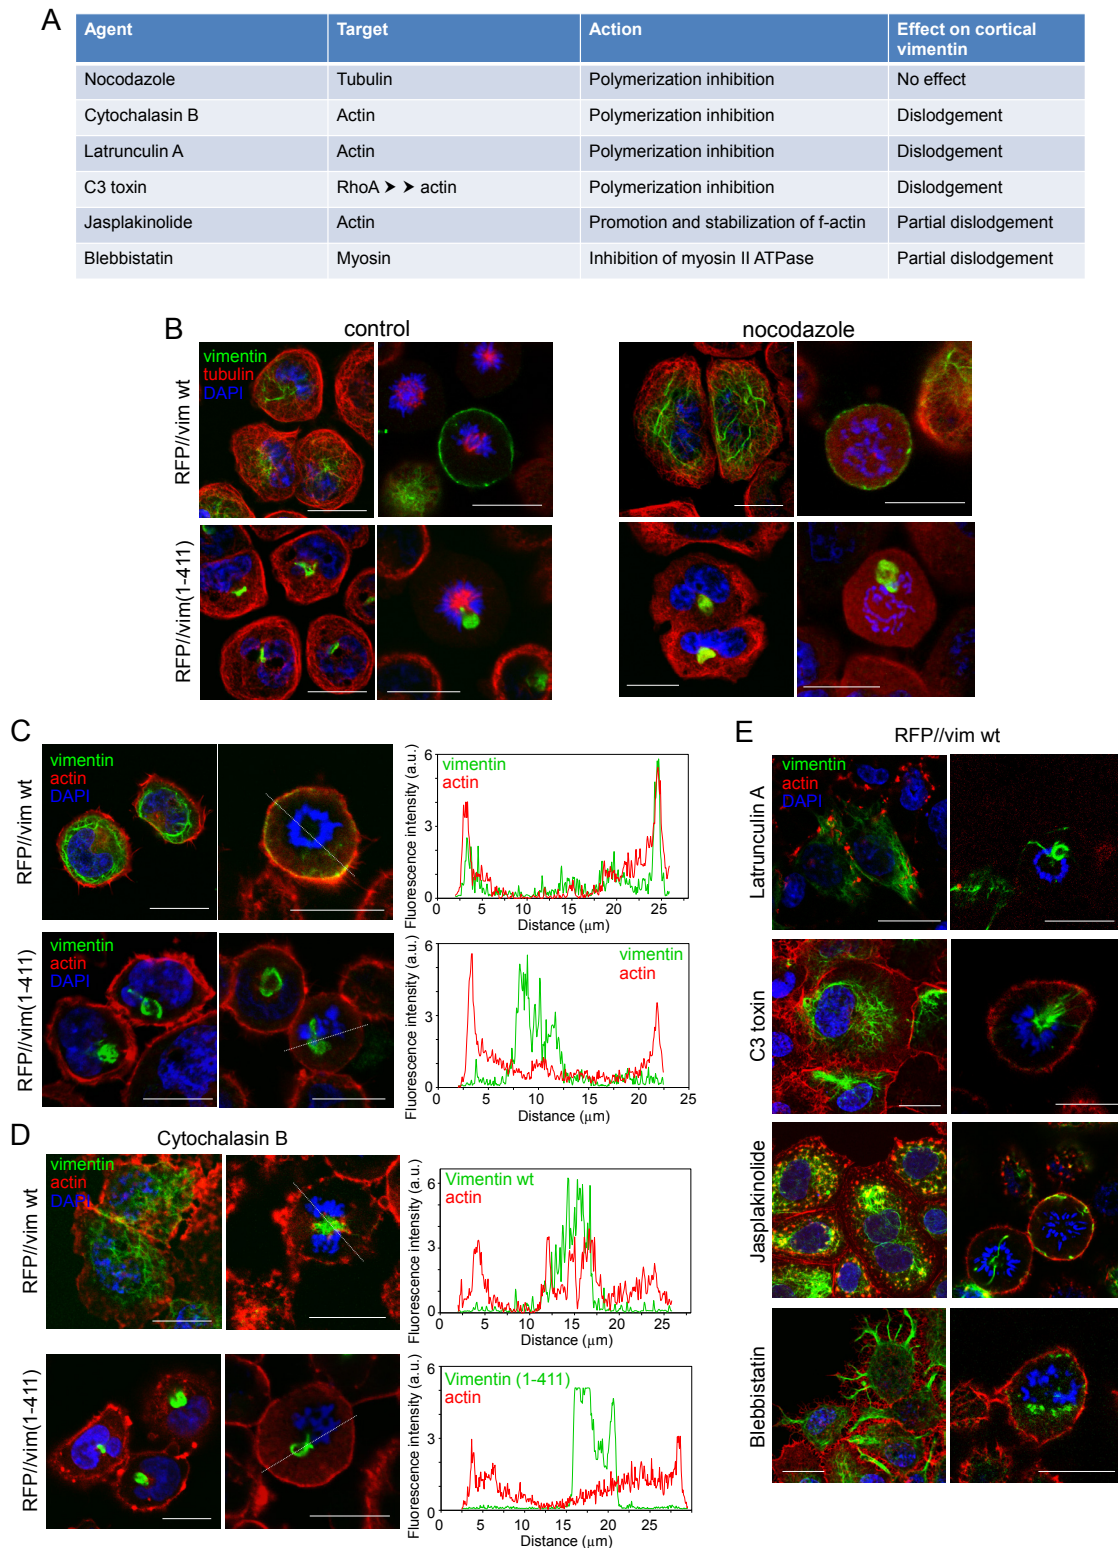

721

722 **Fig. 3. Effect of disrupting microtubules or actin filaments on the distribution of vimentin wt**

723 **and vimentin(1-411).** (A) Agents used to disrupt cytoskeletal structures. (B-E) The distribution

724 of vimentin and tubulin or actin was assessed in interphase (left images for all experimental

725 conditions) and mitotic cells (right images). (B) SW13/cl.2 cells transfected with RFP//vimentin



726 wt or (1-411) were treated in the absence or presence of 5  $\mu$ M nocodazole for 30 min in  
727 serum-free medium. Vimentin (green) and tubulin (red) were visualized by  
728 immunofluorescence. (C) SW13/cl.2 cells were transfected as above and fixed. F-actin was  
729 stained with Phalloidin (red). Fluorescence intensity profiles of vimentin and actin along the  
730 dotted lines are shown in the right panels. (D) SW13/cl.2 cells transfected with RFP//vimentin  
731 wt or (1-411) were cultured in the absence or presence of 10  $\mu$ g/ml cytochalasin B for 30 min  
732 in serum-free medium. Vimentin and f-actin were detected as above and their fluorescence  
733 intensity profiles along the dotted lines are shown in the right panels. (E) Cells transfected with  
734 RFP//vimentin wt were treated in serum-free medium with 2.5  $\mu$ M latrunculin A for 30 min, 2  
735  $\mu$ g/ml C3 toxin for 3 h, 50 nM jasplakinolide for 30 min, or 20  $\mu$ M blebbistatin for 1 h, as  
736 indicated, and processed by immunofluorescence. Images of single sections taken at mid-  
737 height of resting and dividing cells are shown.

738

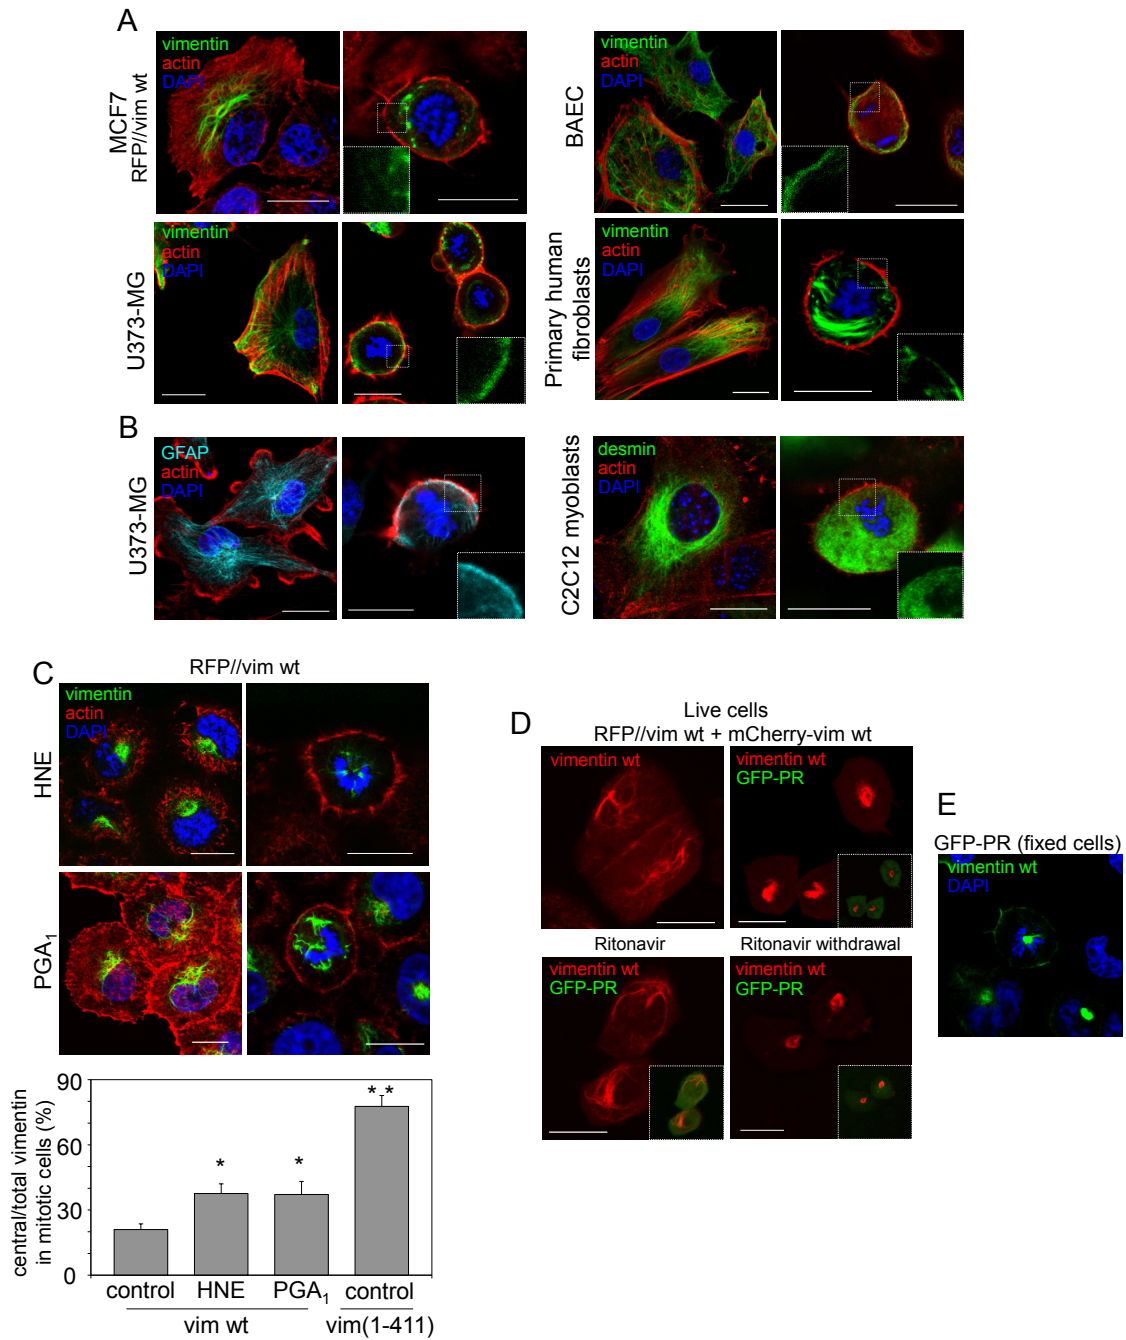

739

740 Fig. 4. Association of type-III intermediate filaments with the mitotic cortex in several cell

741 types and pathophysiological conditions. (A) The distribution of f-actin and vimentin in

742 interphase and mitotic cells was assessed in several cell types expressing endogenous

743 (astrocytoma U-373 MG cells, bovine aortic endothelial cells (BAEC), human dermal

744 fibroblasts) or transfected (breast carcinoma MCF7 cells) vimentin. Inserts depict enlarged

745 areas of the cell periphery showing vimentin distribution. Nuclei were counterstained with

746 DAPI. Single sections at mid-cell height are shown in all panels. Single channel images, as well  
747 as fluorescence intensity profiles for actin and vimentin, are shown in Supplementary Fig. 3. (B)  
748 The distribution of GFAP and desmin was assessed by immunofluorescence in mitotic human  
749 astrocytoma U-373 MG cells and murine C2C12 myoblasts, respectively. (C) SW13/cl.2 cells  
750 expressing RFP//vimentin wt were treated with electrophilic lipids, 10  $\mu$ M 4-hydroxynonenal  
751 (HNE) for 4 h or 20  $\mu$ M prostaglandin A<sub>1</sub> (PGA<sub>1</sub>) for 20 h, and processed as above. The  
752 histogram shows average values  $\pm$  SEM from 15 determinations of the central versus total  
753 vimentin cellular fluorescence ratio, as an index of the impairment of peripheral localization.  
754 The values corresponding to vimentin(1-411) are included here for comparison. \* $P$ <0.05;  
755 \*\* $P$ <0.001 by Student's *t*-test. (D) SW13/cl.2 cells were transfected with a combination of  
756 RFP//vimentin wt (80%) plus a tracer amount of mCherry-vimentin wt (20%), to monitor  
757 vimentin filaments (red) in live cells. In addition, cells were transfected with GFP-PR, coding  
758 the HIV-type I protease, and the corresponding green fluorescence is depicted in insets. In  
759 upper panels, cells were imaged 24 h after transfection. In the lower panels, the HIV inhibitor  
760 ritonavir was added immediately after transfection and cells were imaged 24 h later (left  
761 panel). Note the more intense GFP fluorescence indicative of the inhibition of GFP-PR  
762 autolysis. Subsequently, ritonavir was removed and cells were imaged 5 h later (right panel).  
763 (E) At the end of the experiment, cells were fixed and stained with DAPI to identify mitotic  
764 cells. Vimentin is artificially colored in green.

765

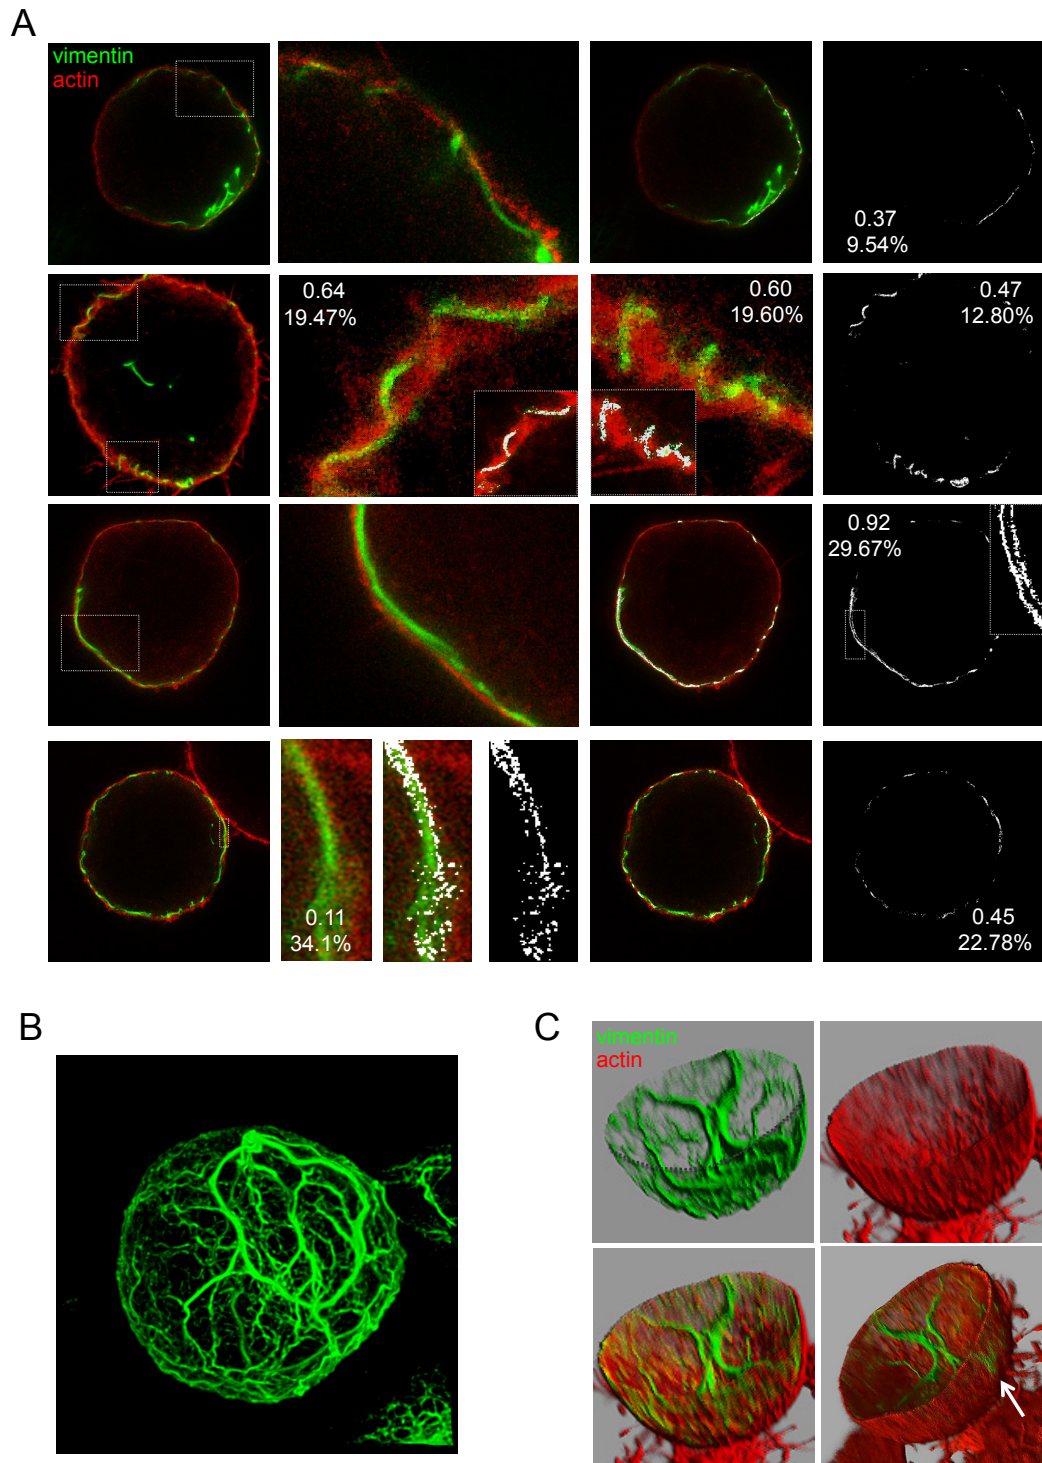

766

767 Fig. 5. Analysis of the relative positions of vimentin and actin in mitosis by STED

768 superresolution microscopy. SW13/cl.2 cells stably transfected with RFP//vimentin wt were

769 treated with 0.4  $\mu$ M nocodazole overnight, to increase the proportion of cells in mitosis, as

770 described in the experimental section. Vimentin was detected by immunofluorescence with

771 Alexa488-conjugated V9 antibody and actin was stained with TRITC-Phalloidin. (A) STED images

772 of several cells are shown. Co-localization analysis was performed with Leica software.  
773 Numbers in insets represent the Pearson's coefficient and the percentage of co-localization,  
774 respectively, for the whole cell or for the regions enlarged, as indicated. (B) 3D-reconstruction  
775 of vimentin organization, after deconvolution of the green channel using Imaris software, for  
776 one representative cell. (C) 3D-reconstruction using the basal half of the sections from the  
777 same cell in order to show the "inside" and the "outside" of the sphere. Single channels (upper  
778 panels) and merged images (lower panels) are shown. The semi-sphere edge is marked in the  
779 green channel (dotted line). The bottom-right image is a snapshot of Supplementary video 5. A  
780 point where vimentin protrudes through the actin cortex is indicated by an arrow.

781

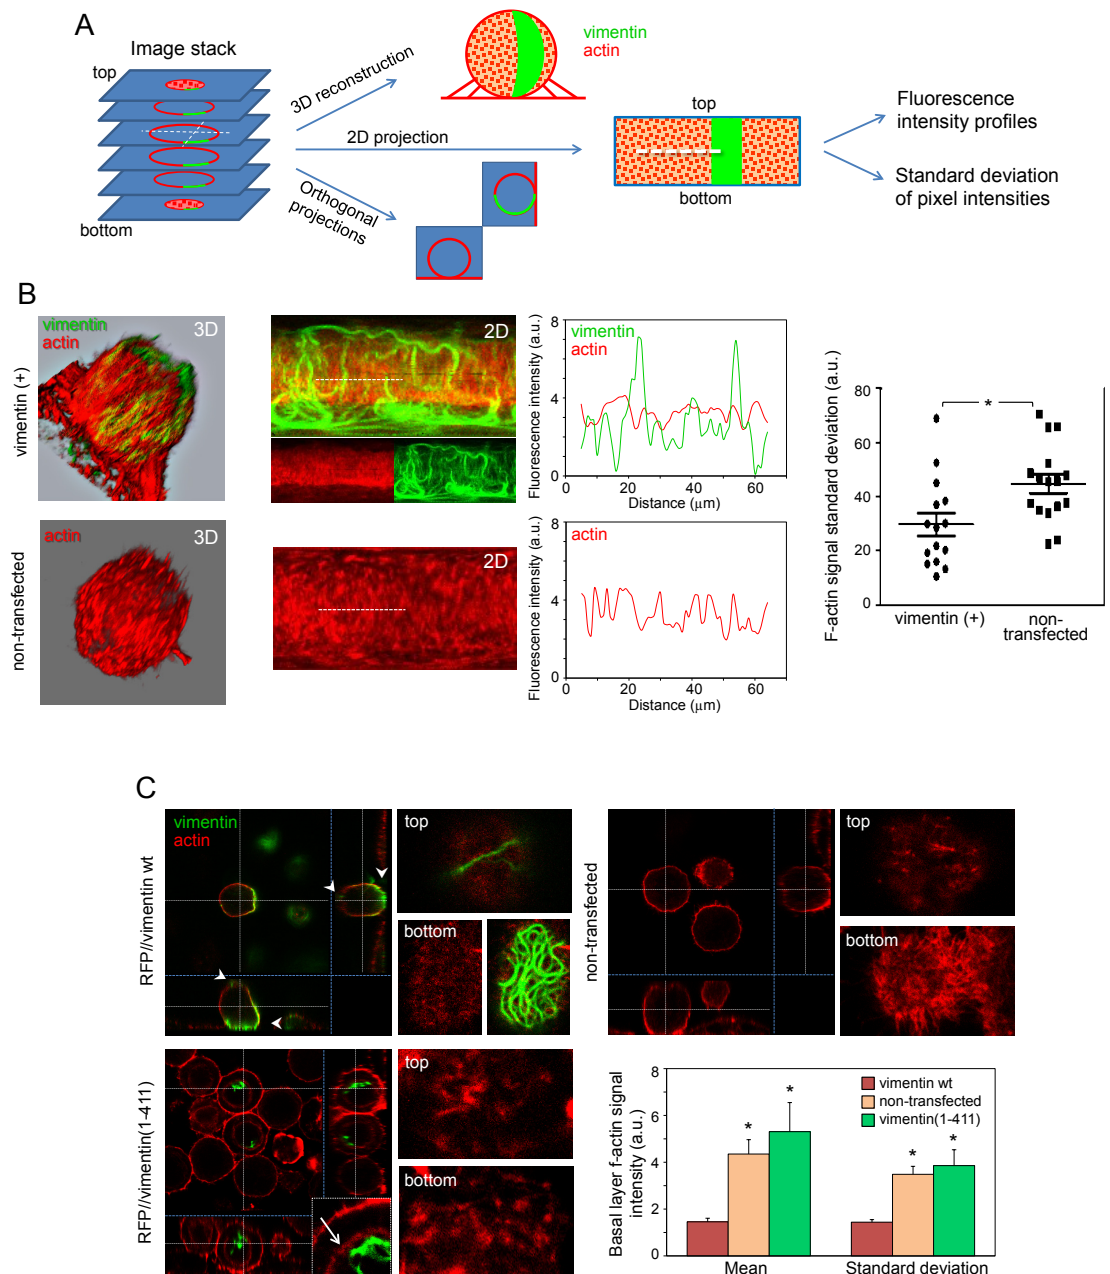

790 2D-maps from 16 cells per experimental condition; \* $P < 0.05$  by unpaired  $t$ -test. (C) SW13/cl.2  
791 cells were transfected with RFP//vimentin wt (stable transfection), RFP//vimentin(1-411)  
792 (transient transfection) or non-transfected. Orthogonal projections illustrate the positions of  
793 the vimentin constructs. Arrowheads mark the appearance of vimentin wt at the top and at  
794 the bottom of the cell. The inset shows an enlarged image illustrating the localization of  
795 vimentin(1-411) with respect to the cytoplasmic actin ring (marked by an arrow). Right panels  
796 show the top and bottom sections for every construct. The histogram depicts the mean and  
797 standard deviation of f-actin signal intensity at the bottom section. Values are average  $\pm$  SEM  
798 from at least 10 determinations. \* $P < 0.05$  vs vimentin wt.

799

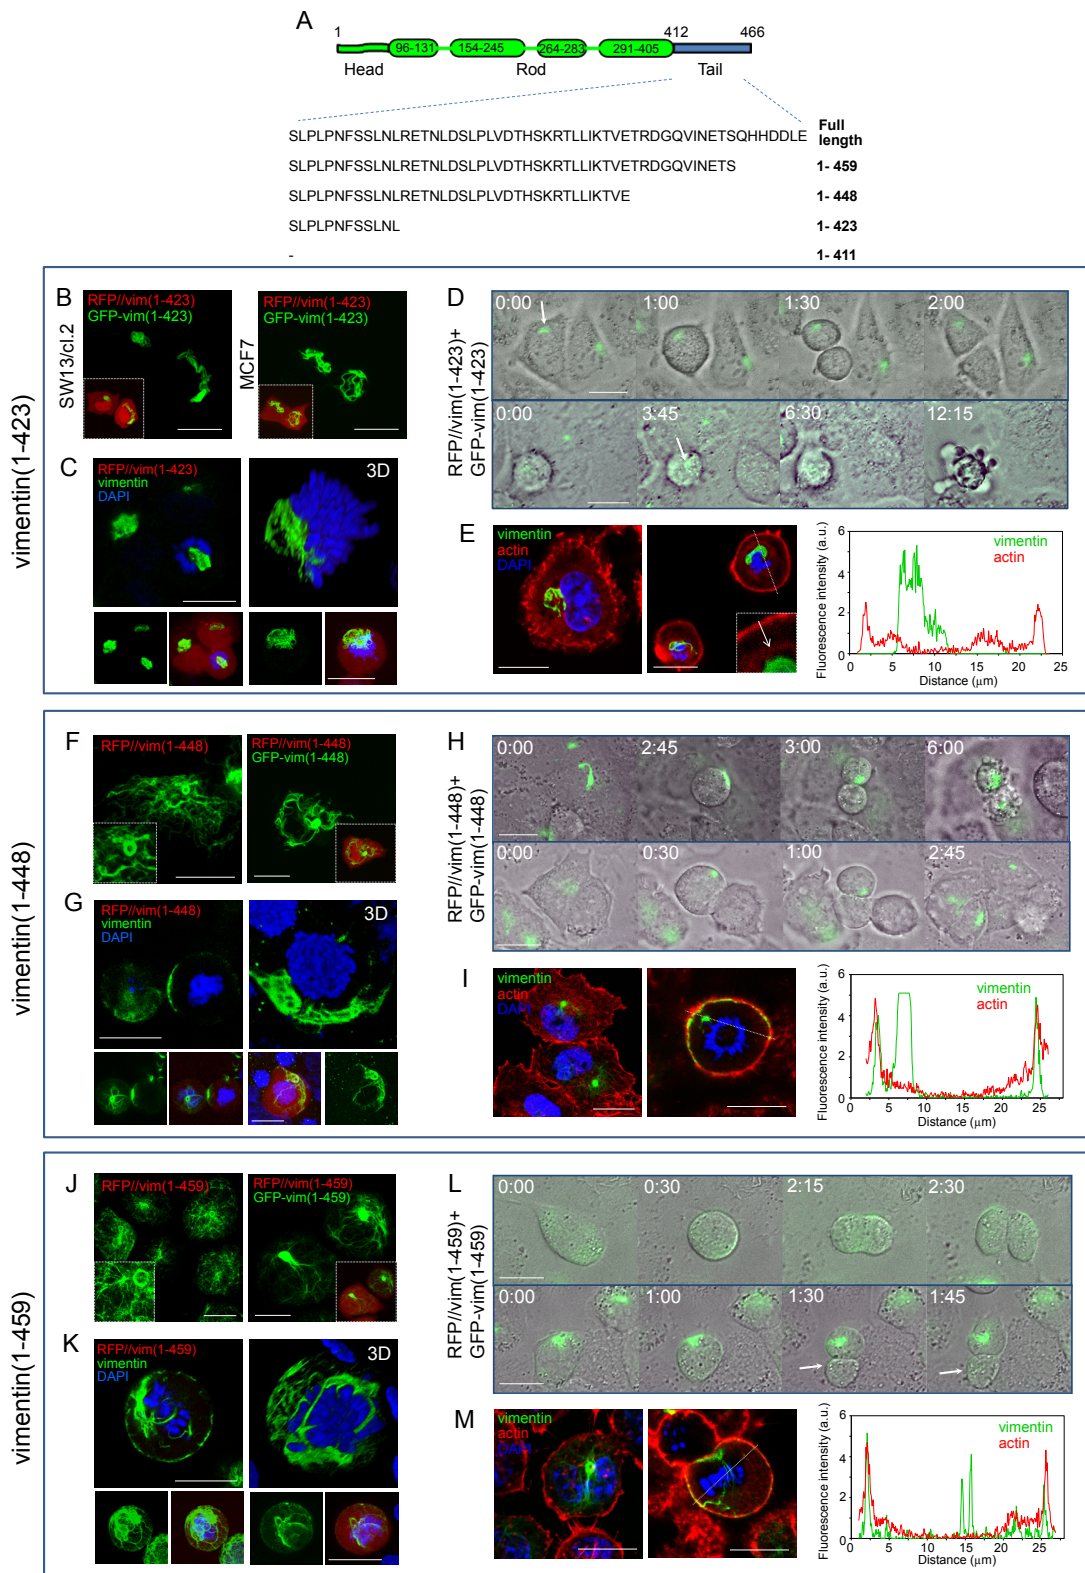

800

801 Fig. 7. Organization and mitotic distribution of several C-terminal truncated vimentin

802 mutants. (A) Scheme of the various vimentin truncated mutants generated. (B) Overall

803 projections of live SW13/cl.2 or MCF7 cells transfected with RFP//vimentin(1-423) plus GFP-



804 vimentin(1-423). Insets depict the overlay with the RFP background fluorescence delimiting the  
805 cell contour. (C) SW13/cl.2 cells were transfected with RFP//vimentin(1-423) and the  
806 distribution of truncated vimentin in mitosis was assessed by immunofluorescence. Nuclei  
807 were counterstained with DAPI. A representative single section at mid-cell height (left) and a  
808 3D-projection (right) are shown. Lower panels depict overall projections of vimentin alone  
809 (green channel) or the overlay of vimentin, DAPI and the red background fluorescence. (D) Live  
810 cells transfected with RFP//vimentin(1-423) plus GFP-vimentin(1-423) were monitored by  
811 time-lapse microscopy. Representative cases of vimentin asymmetric partition (upper panels)  
812 and mitotic catastrophe (lower panels) are shown. (E) Cells were transfected as in (C) and the  
813 distribution of vimentin and f-actin was monitored in interphase (left) and mitosis (right).  
814 Images are single sections at mid-cell height. The arrow marks the position of the cytoplasmic  
815 actin ring. The right panel shows fluorescence intensity profiles of vimentin and actin signals  
816 along the dotted line drawn on a mitotic cell. (F and J) Cells were transfected with  
817 RFP//vimentin(1-448) in (F), or RFP//vimentin(1-459) in (J), alone or in combination with the  
818 corresponding GFP fusion construct, as indicated, and vimentin distribution was monitored by  
819 immunofluorescence (left panels) or live cell direct visualization (right panels). (G and K) Cells  
820 transfected with RFP//vimentin(1-448) in (G), or RFP//vimentin(1-459) in (K) were analyzed as  
821 in (C). (H) Representative sequence from time-lapse monitoring of live cells transfected with  
822 RFP//vimentin(1-448) showing an incomplete division ending in cell death (upper panel) and  
823 an asymmetric division (lower panel). (L) Sequence from live-cell monitoring after transfection  
824 with RFP//vimentin(1-459) showing a normal division (upper panel) and an asymmetric  
825 division (lower panel). (I and M) The distribution of vimentin and f-actin in cells transfected  
826 with RFP//vimentin(1-448) (I) or RFP//vimentin(1-459) (M) was monitored in resting and  
827 mitotic cells, as described for panel (E).

828

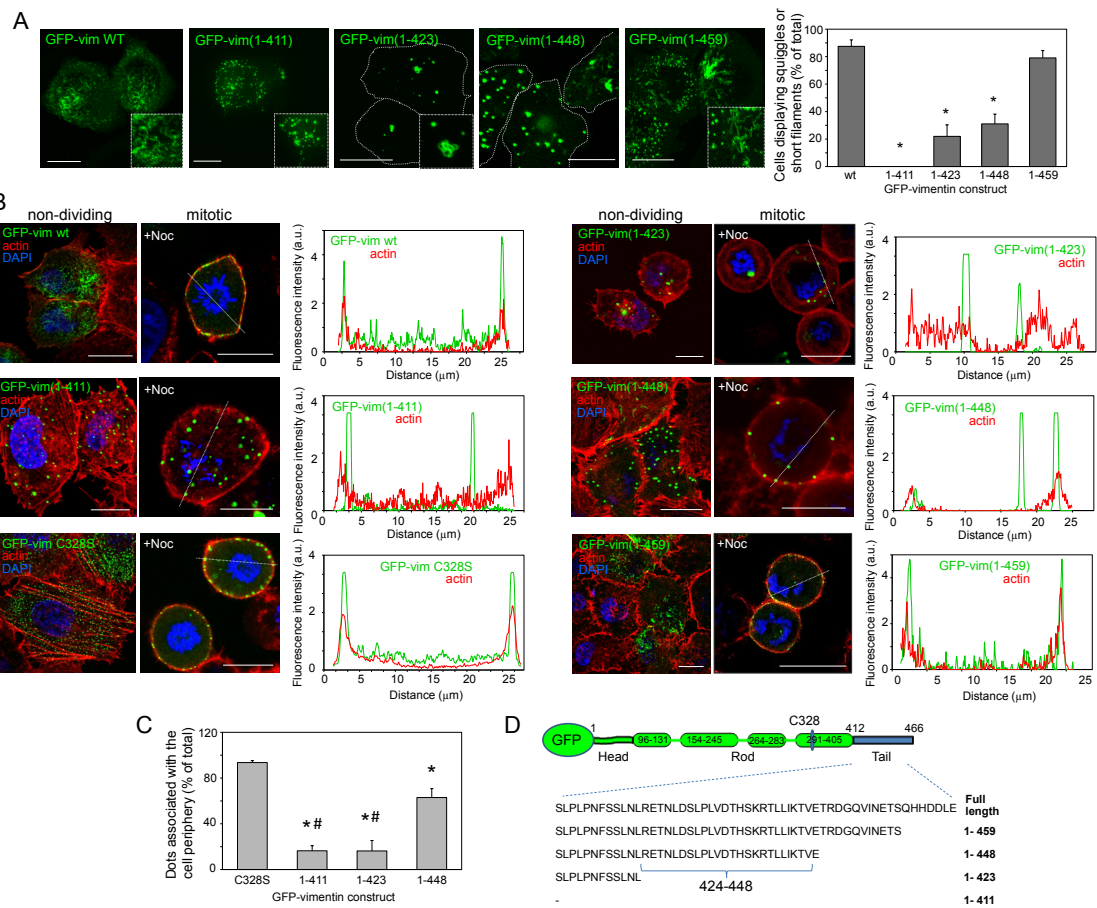

829

830 Fig. 8. Assembly and distribution of GFP fusion constructs of truncated forms of vimentin. (A)

831 Live confocal microscopy assessment of the morphology of vimentin assemblies 48 h after

832 transfection of SW13/cl.2 cells with the constructs shown in panel (D). Overall projections are

833 shown. Insets show enlarged areas of interest. The histogram (right) depicts the percentage of

834 cells with squiggles or short filaments for every construct. Results are average values  $\pm$  SEM of

835 at least 15 fields from several experiments totaling at least 100 cells per experimental

836 condition. \* $P < 0.05$  by Student's  $t$ -test. (B) Cells were transfected with the indicated constructs,

837 fixed, and the distribution of vimentin and f-actin analyzed as above. Both interphase (left

838 images) and mitotic cells (right images) are shown. Where indicated, cells were treated

839 overnight with 0.4  $\mu\text{M}$  nocodazole (+Noc) in complete medium to increase the proportion of

840 mitotic cells. Nuclei were counterstained with DAPI. Single sections taken at mid-cell height are

841 shown in all cases. The fluorescence intensity profiles for vimentin and f-actin along the dotted

842 lines are shown on the right for every condition. (C) The histogram shows the proportion of  
843 dots associated with the cell periphery for every construct. In this case, GFP-vimentin C328S,  
844 which contains the tail domain but assembles in dots, is used as a control. GFP-vimentin(1-459)  
845 is excluded from this graph due to its organization mainly in squiggles or short filaments.  
846 Results are average values of at least 10 fields from at least three experiments per condition.  
847 \* $P < 0.01$  vs GFP-vimentin C328S; # $P < 0.001$  vs GFP-vimentin(1-448). (D) Scheme illustrating the  
848 sequence of the various GFP-vimentin truncated constructs. The approximate position of C328  
849 is indicated.

850
